# Supplementary material for: Quantitative amino acid analysis by liquid chromatography‐tandem mass spectrometry using low cost derivatization and an automated liquid handler
Source: PubMed Central journal article supplement (PMC7012744; doi:10.1002/jmd2.12080), 2019-11-12
Supplement: JMD2-51-62-s002.pdf [file JMD2-51-62-s002.pdf]

## Supplementary Tables

### Table of Contents

|                                                                                      |    |
|--------------------------------------------------------------------------------------|----|
| Table S1. Chromatography gradient.....                                               | 2  |
| Table S2. Selective reaction monitoring.....                                         | 3  |
| Table S3. Standard curve analysis – derivatized amino acids .....                    | 4  |
| Table S4. Standard curve analysis – underivatized isoleucine and allo-Ile .....      | 10 |
| Table S5. Supplementary precision data – derivatized amino acids.....                | 11 |
| Table S6. Supplementary precision data – underivatized isoleucine and allo-Ile ..... | 12 |
| Table S7. Method correlation – patient plasma .....                                  | 13 |
| Table S8. Ion Suppression/ Matrix Effect Data Analysis.....                          | 17 |
| Table S9. Spiked plasma analysis.....                                                | 18 |
| Table S10. Spiked urine analysis.....                                                | 19 |
| Table S11. Spiked CSF analysis.....                                                  | 19 |
| Table S12. Unlabeled isoleucine and allo-isoleucine in plasma.....                   | 19 |
| Table S13. Matrix-specific precision and signal suppression results.....             | 20 |
| Table S14. Lipemia mixing studies (plasma).....                                      | 25 |

**Table S1. Chromatography gradient.**

| <b>Time (min)</b> | <b>Mobile Phase A (%)<sup>a</sup></b> | <b>Mobile Phase B (%)<sup>b</sup></b> |
|-------------------|---------------------------------------|---------------------------------------|
| 0.00              | 97                                    | 3                                     |
| 4.40              | 60                                    | 40                                    |
| 6.50              | 60                                    | 40                                    |
| 6.80              | 10                                    | 90                                    |
| 7.50              | 10                                    | 90                                    |
| 7.80              | 97                                    | 3                                     |
| 11.00             | 97                                    | 3                                     |

<sup>a</sup> 0.1% formic acid and 0.01% heptafluorobutyric acid (v/v) in water

<sup>b</sup> 0.1% formic acid and 0.01% heptafluorobutyric acid (v/v) in methanol

**Table S2. Selective Reaction Monitoring.**

| Target <sup>a</sup> | Q1/Q3 <sup>b</sup> | Time <sup>c</sup> | Window <sup>d</sup> | CE (eV) |
|---------------------|--------------------|-------------------|---------------------|---------|
| PEA                 | 290.1/121.1        | 2                 | 60                  | 33      |
| Tau                 | 274.1/121.1        | 2.14              | 40                  | 30      |
| Asn                 | 281.2/121.1        | 2.88              | 50                  | 30      |
| Ser                 | 254.2/121.1        | 3.02              | 50                  | 27      |
| Ser (I.S.)          | 258.2/121.1        | 3.02              | 50                  | 27      |
| Gly                 | 224.1/121.1        | 3.2               | 50                  | 25      |
| Gly (I.S.)          | 227.2/121.1        | 3.2               | 50                  | 25      |
| Gln                 | 295.2/121.1        | 3.24              | 50                  | 30      |
| Asp                 | 282.1/121.1        | 3.37              | 50                  | 29      |
| Asp (I.S.)          | 287.2/121.1        | 3.37              | 50                  | 29      |
| His                 | 304.2/121.1        | 3.7               | 60                  | 28      |
| His (I.S.)          | 313.2/121.1        | 3.7               | 60                  | 28      |
| Cit                 | 324.2/121.1        | 3.55              | 50                  | 30      |
| Thr                 | 268.2/121.1        | 3.7               | 50                  | 28      |
| Thr (I.S.)          | 273.2/121.1        | 3.9               | 50                  | 28      |
| Ala                 | 238.2/121.1        | 3.8               | 50                  | 30      |
| Ala (I.S.)          | 242.2/121.1        | 3.8               | 50                  | 30      |
| Glu                 | 296.2/121.1        | 3.75              | 50                  | 27      |
| Glu (I.S.)          | 302.2/121.1        | 3.75              | 50                  | 27      |
| ASA                 | 439.2/121.1        | 3.8               | 65                  | 40      |
| Arg                 | 323.2/121.1        | 4.3               | 60                  | 32      |
| Arg (I.S.)          | 333.2/121.1        | 4.3               | 60                  | 32      |
| HCT                 | 338.2/121.1        | 4.32              | 50                  | 28      |
| Orn                 | 429.3/121.1        | 4.5               | 50                  | 40      |
| Pro                 | 264.2/121.1        | 4.6               | 40                  | 37      |
| Pro (I.S.)          | 270.2/121.1        | 4.6               | 40                  | 37      |
| Cys                 | 537.2/121.1        | 4.65              | 40                  | 50      |
| Cys (I.S.)          | 545.3/121.1        | 4.65              | 40                  | 50      |
| Lys                 | 443.3/121.1        | 4.8               | 40                  | 40      |
| Lys (I.S.)          | 451.3/121.1        | 4.8               | 40                  | 40      |
| uLeu deriv.         | 132.1/86.1         | 4.9               | 100                 | 14      |
| uLeu deriv. (I.S.)  | 139.1/92.1         | 4.9               | 100                 | 14      |
| Met (I.S.)          | 304.2/121.1        | 5.35              | 60                  | 28      |
| Met                 | 298.2/121.1        | 5.35              | 60                  | 28      |
| Val                 | 266.2/121.1        | 5.6               | 80                  | 37      |
| Val (I.S.)          | 272.2/121.1        | 5.6               | 80                  | 37      |
| Hcy                 | 565.3/121.1        | 5.5               | 50                  | 60      |
| Tyr                 | 330.2/121.1        | 5.62              | 40                  | 30      |
| Tyr (I.S.)          | 340.2/121.1        | 5.5               | 40                  | 30      |
| Ile/Leu             | 280.2/121.1        | 6.3               | 80                  | 37      |
| Ile/Leu (I.S.)      | 287.2/121.1        | 6.3               | 80                  | 37      |
| Phe                 | 314.2/121.1        | 6.33              | 50                  | 28      |
| Phe (I.S.)          | 324.2/121.1        | 6.33              | 50                  | 28      |
| Trp                 | 353.2/121.1        | 6.8               | 40                  | 30      |

<sup>a</sup> Selective reaction monitoring targets consist of aTRAQ reagent ( $\Delta 8$ ) derivatized amino acids and aTRAQ reagent ( $\Delta 8$ ) derivatized stable-isotope ( $^{13}\text{C}$ ,  $^{15}\text{N}$ ) labeled AA analogs (I.S.), underivatized leucine derivatives, and underivatized isotopically labeled leucine derivatives, the latter two required for *allo*-Ile analysis and Ile measurement in the presence of *allo*-Ile. Phosphorylethanolamine is detectable but is not quantified or reported.

<sup>b</sup> Mass transitions (Q1/Q3) for target amino acids were provided by the kit manufacturer. Mass transitions for the analogous amino acid internal standards ( $^{13}\text{C}$ ,  $^{15}\text{N}$ -labeled) were calculated based on the expected number of isotopically labeled carbon and nitrogen atoms in the native AA structure. Mass transition for underivatized,  $^{13}\text{C}$ ,  $^{15}\text{N}$ -labeled leucine derivatives (“uLeu deriv. (I.S.)”) were determined empirically via direct infusion experiment.

<sup>c</sup> Chromatography peak center.

<sup>d</sup> Time window to include target as part of the SRM scanning, centered on the retention time.

Table S3. Standard curve analysis – derivatized amino acids (Page 1 of 6) .

| Target |            | Run A       |          | Run B       |          | Run C       |          | Analysis |       |       | Plot <sup>a</sup>                                                            |
|--------|------------|-------------|----------|-------------|----------|-------------|----------|----------|-------|-------|------------------------------------------------------------------------------|
| AA     | Conc. (µM) | Result (µM) | Rec. (%) | Result (µM) | Rec. (%) | Result (µM) | Rec. (%) | Mean     | SD    | %CV   |                                                                              |
| Ala    | 5          | 5.3         | 106.2    | 3.8         | 76.7     | 4.6         | 92.4     | 4.6      | 0.74  | 16.02 | <p>Ala<br/>LCMS (µM)<br/>Y = 0.9608*X + 2.055<br/>R<sup>2</sup> = 0.9988</p> |
|        | 10         | 10.8        | 107.7    | 10.0        | 99.7     | 10.0        | 100.1    | 10.2     | 0.45  | 4.43  |                                                                              |
|        | 50         | 46.1        | 92.1     | 48.5        | 97.0     | 48.4        | 96.7     | 47.6     | 1.36  | 2.85  |                                                                              |
|        | 250        | 250.4       | 100.2    | 220.3       | 88.1     | 235.9       | 94.4     | 235.5    | 15.09 | 6.41  |                                                                              |
|        | 1000       | 966.7       | 96.7     | 963.3       | 96.3     | 980.6       | 98.1     | 970.2    | 9.15  | 0.94  |                                                                              |
|        | 1500       | 1485.8      | 99.1     | 1460.0      | 97.3     | 1483.4      | 98.9     | 1476.4   | 14.25 | 0.97  |                                                                              |
|        | 2000       | 1930.2      | 96.5     | 1928.8      | 96.4     | 1829.1      | 91.5     | 1896.0   | 57.95 | 3.06  |                                                                              |
| Arg    | 5          | 4.2         | 84.9     | 5.3         | 106.5    | 5.7         | 113.2    | 5.1      | 0.74  | 14.61 | <p>Arg<br/>LCMS (µM)<br/>Y = 0.9040*X + 4.461<br/>R<sup>2</sup> = 0.9975</p> |
|        | 10         | 10.1        | 100.5    | 9.0         | 90.1     | 10.2        | 102.0    | 9.8      | 0.65  | 6.64  |                                                                              |
|        | 50         | 47.4        | 94.7     | 47.1        | 94.2     | 46.7        | 93.4     | 47.1     | 0.33  | 0.71  |                                                                              |
|        | 250        | 241.3       | 96.5     | 225.1       | 90.0     | 233.7       | 93.5     | 233.4    | 8.09  | 3.47  |                                                                              |
|        | 1000       | 986.4       | 98.6     | 896.4       | 89.6     | 845.9       | 84.6     | 909.6    | 71.17 | 7.83  |                                                                              |
|        | 1500       | 1458.1      | 97.2     | 1316.4      | 87.8     | 1391.2      | 92.8     | 1388.6   | 70.93 | 5.11  |                                                                              |
|        | 2000       | 1809.4      | 90.5     | 1791.8      | 89.6     | 1770.2      | 88.5     | 1790.5   | 19.61 | 1.10  |                                                                              |
| ASA    | 5          | 5.8         | 115.7    | 8.1         | 161.7    | 5.94        | 118.8    | 6.6      | 1.29  | 19.48 | <p>ASA<br/>LCMS (µM)<br/>Y = 1.079*X + 3.540<br/>R<sup>2</sup> = 0.9989</p>  |
|        | 10         | 8.7         | 87.1     | 11.5        | 115.3    | 11.69       | 116.9    | 10.6     | 1.68  | 15.75 |                                                                              |
|        | 50         | 55.1        | 110.2    | 50.0        | 100.0    | 46.08       | 92.2     | 50.4     | 4.52  | 8.97  |                                                                              |
|        | 250        | 289.8       | 115.9    | 265.3       | 106.1    | 256.99      | 102.8    | 270.7    | 17.05 | 6.30  |                                                                              |
|        | 1000       | 1164.2      | 116.4    | 1051.3      | 105.1    | 996.41      | 99.6     | 1070.6   | 85.55 | 7.99  |                                                                              |
|        | 1500       | 1661.9      | 110.8    | 1650.1      | 110.0    | 1599.10     | 106.6    | 1637.0   | 33.36 | 2.04  |                                                                              |
|        | 2000       | 2168.9      | 108.4    | 2119.0      | 106.0    | 2156.32     | 107.8    | 2148.1   | 25.92 | 1.21  |                                                                              |
| Asn    | 5          | 5.1         | 102.4    | 4.8         | 96.0     | 4.5         | 88.9     | 4.8      | 0.34  | 7.00  | <p>Asn<br/>LCMS (µM)<br/>Y = 0.8746*X + 4.764<br/>R<sup>2</sup> = 0.9986</p> |
|        | 10         | 9.6         | 96.0     | 9.4         | 94.0     | 9.5         | 95.0     | 9.5      | 0.11  | 1.11  |                                                                              |
|        | 50         | 41.7        | 83.3     | 42.0        | 83.9     | 46.0        | 92.1     | 43.2     | 2.44  | 5.65  |                                                                              |
|        | 250        | 218.2       | 87.3     | 219.5       | 87.8     | 233.3       | 93.3     | 223.7    | 8.39  | 3.75  |                                                                              |
|        | 1000       | 911.4       | 91.1     | 904.6       | 90.5     | 894.4       | 89.4     | 903.4    | 8.54  | 0.95  |                                                                              |
|        | 1500       | 1326.8      | 88.5     | 1379.7      | 92.0     | 1257.9      | 83.9     | 1321.5   | 61.07 | 4.62  |                                                                              |
|        | 2000       | 1695.7      | 84.8     | 1766.9      | 88.4     | 1753.0      | 87.7     | 1738.5   | 37.78 | 2.17  |                                                                              |
| Asp    | 5          | 5.2         | 104.5    | 5.0         | 99.7     | 5.1         | 102.1    | 5.1      | 0.12  | 2.35  | <p>Asp<br/>LCMS (µM)<br/>Y = 1.067*X + 0.7026<br/>R<sup>2</sup> = 0.9991</p> |
|        | 10         | 11.0        | 110.3    | 11.0        | 109.9    | 10.9        | 109.4    | 11.0     | 0.05  | 0.41  |                                                                              |
|        | 50         | 51.4        | 102.8    | 56.4        | 112.9    | 55.1        | 110.2    | 54.3     | 2.61  | 4.80  |                                                                              |
|        | 250        | 265.4       | 106.2    | 263.4       | 105.4    | 270.7       | 108.3    | 266.5    | 3.75  | 1.41  |                                                                              |
|        | 1000       | 1037.5      | 103.8    | 1117.7      | 111.8    | 1042.4      | 104.2    | 1065.9   | 44.96 | 4.22  |                                                                              |
|        | 1500       | 1604.4      | 107.0    | 1663.8      | 110.9    | 1570.4      | 104.7    | 1612.9   | 47.28 | 2.93  |                                                                              |
|        | 2000       | 2131.8      | 106.6    | 2088.8      | 104.4    | 2161.0      | 108.1    | 2127.2   | 36.35 | 1.71  |                                                                              |

Dark green recovery (Rec.) cells indicate LCMS result within ±10% of expected target, light green within 20%, yellow within 30%, red >30% difference. ASA = argininosuccinic acid

<sup>a</sup> Target concentration on X-axis

Table S3. Standard curve analysis – derivatized amino acids (Page 2 of 6)

| Target |            | Run A       |          | Run B       |          | Run C       |          | Analysis |           |       | Plot <sup>a</sup>                                                                  |
|--------|------------|-------------|----------|-------------|----------|-------------|----------|----------|-----------|-------|------------------------------------------------------------------------------------|
| AA     | Conc. (µM) | Result (µM) | Rec. (%) | Result (µM) | Rec. (%) | Result (µM) | Rec. (%) | Mean     | Std. Dev. | %CV   |                                                                                    |
| Cit    | 5          | 4.5         | 90.4     | 4.8         | 94.9     | 4.5         | 90.7     | 4.6      | 0.13      | 2.83  | <p>Cit<br/> <math>Y = 1.018 * X + 0.5543</math><br/> <math>R^2 = 0.9984</math></p> |
|        | 10         | 8.5         | 85.0     | 9.4         | 94.2     | 9.7         | 96.8     | 9.2      | 0.62      | 6.74  |                                                                                    |
|        | 50         | 49.5        | 99.0     | 48.3        | 96.7     | 49.7        | 99.5     | 49.2     | 0.75      | 1.53  |                                                                                    |
|        | 250        | 239.5       | 95.8     | 226.1       | 90.4     | 252.9       | 101.2    | 239.5    | 13.41     | 5.60  |                                                                                    |
|        | 1000       | 1007.8      | 100.8    | 1038.8      | 103.9    | 1068.0      | 106.8    | 1038.2   | 30.10     | 2.90  |                                                                                    |
|        | 1500       | 1534.2      | 102.3    | 1532.2      | 102.2    | 1620.4      | 108.0    | 1562.3   | 50.33     | 3.22  |                                                                                    |
|        | 2000       | 1971.7      | 98.6     | 1984.8      | 99.2     | 2052.5      | 102.6    | 2003.0   | 43.38     | 2.17  |                                                                                    |
| Cys    | 5          | 2.3         | 92.0     | 2.1         | 83.7     | 2.3         | 90.6     | 2.2      | 0.11      | 5.12  | <p>Cys<br/> <math>Y = 1.052 * X - 16.40</math><br/> <math>R^2 = 0.9937</math></p>  |
|        | 10         | 4.1         | 81.5     | 4.8         | 94.9     | 5.5         | 109.2    | 4.8      | 0.69      | 14.49 |                                                                                    |
|        | 50         | 23.4        | 93.5     | 23.9        | 95.5     | 24.2        | 96.7     | 23.8     | 0.40      | 1.67  |                                                                                    |
|        | 250        | 122.2       | 97.7     | 128.6       | 102.9    | 122.9       | 98.3     | 124.6    | 3.51      | 2.82  |                                                                                    |
|        | 1000       | 518.0       | 103.6    | 471.6       | 94.3     | 538.7       | 107.7    | 509.4    | 34.32     | 6.74  |                                                                                    |
|        | 1500       | 744.4       | 99.3     | 747.7       | 99.7     | 789.3       | 105.3    | 760.5    | 25.07     | 3.30  |                                                                                    |
|        | 2000       | 967.3       | 96.7     | 1057.0      | 105.7    | 1110.5      | 111.1    | 1044.9   | 72.36     | 6.93  |                                                                                    |
| Gln    | 5          | 5.2         | 103.4    | 5.2         | 104.6    | 6.5         | 129.1    | 5.6      | 0.73      | 12.96 | <p>Gln<br/> <math>Y = 0.9979 * X + 7.385</math><br/> <math>R^2 = 0.9980</math></p> |
|        | 10         | 10.5        | 105.1    | 11.0        | 109.9    | 10.5        | 105.3    | 10.7     | 0.27      | 2.54  |                                                                                    |
|        | 50         | 53.0        | 105.9    | 54.4        | 108.7    | 51.4        | 102.9    | 52.9     | 1.48      | 2.79  |                                                                                    |
|        | 250        | 261.0       | 104.4    | 264.4       | 105.8    | 246.2       | 98.5     | 257.2    | 9.70      | 3.77  |                                                                                    |
|        | 1000       | 1092.5      | 109.3    | 1063.7      | 106.4    | 953.2       | 95.3     | 1036.5   | 73.51     | 7.09  |                                                                                    |
|        | 1500       | 1550.1      | 103.3    | 1502.1      | 100.1    | 1481.9      | 98.8     | 1511.3   | 35.07     | 2.32  |                                                                                    |
|        | 2000       | 2039.2      | 102.0    | 1971.7      | 98.6     | 1936.6      | 96.8     | 1982.5   | 52.13     | 2.63  |                                                                                    |
| Glu    | 5          | 4.6         | 91.7     | 5.0         | 100.1    | 5.4         | 107.3    | 5.0      | 0.39      | 7.82  | <p>Glu<br/> <math>Y = 1.014 * X + 2.768</math><br/> <math>R^2 = 0.9975</math></p>  |
|        | 10         | 10.2        | 102.1    | 10.4        | 103.5    | 10.2        | 102.0    | 10.3     | 0.08      | 0.82  |                                                                                    |
|        | 50         | 47.9        | 95.7     | 52.2        | 104.4    | 51.7        | 103.4    | 50.6     | 2.37      | 4.69  |                                                                                    |
|        | 250        | 256.4       | 102.6    | 260.6       | 104.3    | 251.1       | 100.4    | 256.0    | 4.80      | 1.87  |                                                                                    |
|        | 1000       | 1042.2      | 104.2    | 1080.8      | 108.1    | 999.6       | 100.0    | 1040.9   | 40.63     | 3.90  |                                                                                    |
|        | 1500       | 1548.5      | 103.2    | 1507.3      | 100.5    | 1474.4      | 98.3     | 1510.1   | 37.13     | 2.46  |                                                                                    |
|        | 2000       | 1913.4      | 95.7     | 2051.9      | 102.6    | 2123.6      | 106.2    | 2029.6   | 106.87    | 5.27  |                                                                                    |
| Gly    | 5          | 5.9         | 118.0    | 5.9         | 118.0    | 4.8         | 95.0     | 5.5      | 0.66      | 12.04 | <p>Gly<br/> <math>Y = 0.9769 * X + 38.74</math><br/> <math>R^2 = 0.9304</math></p> |
|        | 10         | 11.6        | 116.3    | 11.0        | 110.4    | 10.9        | 108.7    | 11.2     | 0.40      | 3.57  |                                                                                    |
|        | 50         | 48.7        | 97.4     | 52.4        | 104.7    | 50.0        | 100.0    | 50.3     | 1.87      | 3.72  |                                                                                    |
|        | 250        | 242.3       | 96.9     | 239.3       | 95.7     | 238.2       | 95.3     | 240.0    | 2.13      | 0.89  |                                                                                    |
|        | 1000       | 1041.7      | 104.2    | 1055.9      | 105.6    | 1896.9      | 189.7    | 1331.5   | 489.72    | 36.78 |                                                                                    |
|        | 1500       | 1528.0      | 101.9    | 1434.9      | 95.7     | 1443.2      | 96.2     | 1468.7   | 51.51     | 3.51  |                                                                                    |
|        | 2000       | 1858.1      | 92.9     | 1915.2      | 95.8     | 1829.9      | 91.5     | 1867.8   | 43.48     | 2.33  |                                                                                    |

Dark green recovery (Rec.) cells indicate LCMS result within ±10% of expected target, light green within 20%, yellow within 30%, red >30% difference.

<sup>a</sup>Target concentration on X-axis

Table S3. Standard curve analysis – derivatized amino acids (Page 3 of 6)

| Target |            | Run A       |          | Run B       |          | Run C       |          | Analysis |        |       | Plot <sup>a</sup> |
|--------|------------|-------------|----------|-------------|----------|-------------|----------|----------|--------|-------|-------------------|
| AA     | Conc. (µM) | Result (µM) | Rec. (%) | Result (µM) | Rec. (%) | Result (µM) | Rec. (%) | Mean     | SD     | %CV   |                   |
| HCY    | 5          | 7.0         | 139.3    | 5.6         | 112.7    | 4.8         | 95.3     | 5.8      | 1.10   | 19.07 |                   |
|        | 10         | 11.7        | 116.7    | 10.9        | 108.8    | 10.8        | 108.2    | 11.1     | 0.47   | 4.26  |                   |
|        | 50         | 56.5        | 113.0    | 50.1        | 100.3    | 51.5        | 103.0    | 52.7     | 3.36   | 6.37  |                   |
|        | 250        | 274.7       | 109.9    | 237.6       | 95.1     | 260.4       | 104.2    | 257.6    | 18.69  | 7.26  |                   |
|        | 1000       | 1047.4      | 104.7    | 980.4       | 98.0     | 1050.5      | 105.1    | 1026.1   | 39.58  | 3.86  |                   |
|        | 1500       | 1523.0      | 101.5    | 1493.2      | 99.6     | 1496.4      | 99.8     | 1504.2   | 16.37  | 1.09  |                   |
|        | 2000       | 1968.0      | 98.4     | 1975.9      | 98.8     | 2010.1      | 100.5    | 1984.6   | 22.42  | 1.13  |                   |
| His    | 5          | 4.6         | 92.9     | 4.4         | 87.6     | 5.2         | 104.0    | 4.7      | 0.42   | 8.84  |                   |
|        | 10         | 9.9         | 99.0     | 9.4         | 94.2     | 10.6        | 106.4    | 10.0     | 0.61   | 6.15  |                   |
|        | 50         | 52.8        | 105.6    | 50.1        | 100.2    | 50.7        | 101.4    | 51.2     | 1.43   | 2.78  |                   |
|        | 250        | 247.2       | 98.9     | 247.1       | 98.8     | 248.0       | 99.2     | 247.4    | 0.53   | 0.21  |                   |
|        | 1000       | 982.0       | 98.2     | 947.3       | 94.7     | 1027.7      | 102.8    | 985.7    | 40.32  | 4.09  |                   |
|        | 1500       | 1526.1      | 101.7    | 1465.9      | 97.7     | 1440.6      | 96.0     | 1477.5   | 43.92  | 2.97  |                   |
|        | 2000       | 1960.2      | 98.0     | 1990.8      | 99.5     | 1969.5      | 98.5     | 1973.5   | 15.69  | 0.80  |                   |
| Ile    | 5          | 4.5         | 90.9     | 4.7         | 93.8     | 4.7         | 93.8     | 4.6      | 0.09   | 1.87  |                   |
|        | 10         | 10.4        | 103.5    | 9.2         | 92.0     | 10.0        | 100.3    | 9.9      | 0.59   | 6.02  |                   |
|        | 50         | 52.5        | 104.9    | 46.3        | 92.6     | 46.0        | 92.0     | 48.3     | 3.65   | 7.57  |                   |
|        | 250        | 249.7       | 99.9     | 242.9       | 97.2     | 232.5       | 93.0     | 241.7    | 8.68   | 3.59  |                   |
|        | 1000       | 1017.6      | 101.8    | 910.2       | 91.0     | 975.3       | 97.5     | 967.7    | 54.10  | 5.59  |                   |
|        | 1500       | 1482.5      | 98.8     | 1316.0      | 87.7     | 1397.6      | 93.2     | 1398.7   | 83.27  | 5.95  |                   |
|        | 2000       | 1971.1      | 98.6     | 1599.3      | 80.0     | 1630.0      | 81.5     | 1733.5   | 206.38 | 11.91 |                   |
| Leu    | 5          | 3.3         | 66.6     | 5.3         | 105.4    | 4.5         | 90.1     | 4.4      | 0.98   | 22.37 |                   |
|        | 10         | 8.4         | 83.6     | 8.8         | 87.8     | 8.6         | 86.0     | 8.6      | 0.21   | 2.46  |                   |
|        | 50         | 43.3        | 86.7     | 48.4        | 96.8     | 42.9        | 85.8     | 44.9     | 3.07   | 6.84  |                   |
|        | 250        | 258.1       | 103.2    | 272.4       | 108.9    | 235.3       | 94.1     | 255.3    | 18.67  | 7.31  |                   |
|        | 1000       | 976.8       | 97.7     | 1121.1      | 112.1    | 983.2       | 98.3     | 1027.0   | 81.53  | 7.94  |                   |
|        | 1500       | 1390.1      | 92.7     | 1594.3      | 106.3    | 1363.1      | 90.9     | 1449.1   | 126.40 | 8.72  |                   |
|        | 2000       | 1712.8      | 85.6     | 1955.6      | 97.8     | 1680.0      | 84.0     | 1782.8   | 150.54 | 8.44  |                   |
| Lys    | 5          | 5.6         | 112.8    | 5.3         | 106.4    | 5.9         | 118.3    | 5.6      | 0.30   | 5.34  |                   |
|        | 10         | 11.4        | 114.0    | 10.3        | 102.9    | 10.9        | 109.4    | 10.9     | 0.56   | 5.13  |                   |
|        | 50         | 50.5        | 101.1    | 49.5        | 99.0     | 47.2        | 94.4     | 49.1     | 1.70   | 3.47  |                   |
|        | 250        | 244.7       | 97.9     | 234.9       | 94.0     | 236.2       | 94.5     | 238.6    | 5.32   | 2.23  |                   |
|        | 1000       | 1001.9      | 100.2    | 986.6       | 98.7     | 942.0       | 94.2     | 976.8    | 31.14  | 3.19  |                   |
|        | 1500       | 1537.8      | 102.5    | 1395.3      | 93.0     | 1454.2      | 97.0     | 1462.5   | 71.57  | 4.89  |                   |
|        | 2000       | 1953.7      | 97.7     | 1845.2      | 92.3     | 1908.6      | 95.4     | 1902.5   | 54.50  | 2.86  |                   |

Dark green recovery (Rec.) cells indicate LCMS result within ±10% of expected target, light green within 20%, yellow within 30%, red >30% difference. HCY = homocysteine

<sup>a</sup> Target concentration on X-axis

Table S3. Standard curve analysis – derivatized amino acids (Page 4 of 6)

| Target |            | Run A       |          | Run B       |          | Run C       |          | Analysis |        |       | Plot <sup>a</sup> |
|--------|------------|-------------|----------|-------------|----------|-------------|----------|----------|--------|-------|-------------------|
| AA     | Conc. (µM) | Result (µM) | Rec. (%) | Result (µM) | Rec. (%) | Result (µM) | Rec. (%) | Mean     | SD     | % CV  |                   |
| Met    | 5          | 4.7         | 93.5     | 4.6         | 91.9     | 4.6         | 91.3     | 4.6      | 0.06   | 1.32  |                   |
|        | 10         | 9.6         | 95.5     | 9.4         | 94.0     | 9.3         | 93.3     | 9.4      | 0.11   | 1.19  |                   |
|        | 50         | 50.2        | 100.3    | 46.9        | 93.7     | 43.3        | 86.5     | 46.8     | 3.45   | 7.37  |                   |
|        | 250        | 224.3       | 89.7     | 230.4       | 92.2     | 221.9       | 88.8     | 225.5    | 4.39   | 1.95  |                   |
|        | 1000       | 943.4       | 94.3     | 950.8       | 95.1     | 913.5       | 91.4     | 935.9    | 19.72  | 2.11  |                   |
|        | 1500       | 1397.8      | 93.2     | 1274.5      | 85.0     | 1336.3      | 89.1     | 1336.2   | 61.62  | 4.61  |                   |
|        | 2000       | 1703.8      | 85.2     | 1657.2      | 82.9     | 1748.0      | 87.4     | 1703.0   | 45.43  | 2.67  |                   |
| Orn    | 5          | 4.8         | 96.1     | 4.9         | 97.7     | 5.3         | 106.2    | 5.0      | 0.27   | 5.49  |                   |
|        | 10         | 9.5         | 94.5     | 8.2         | 81.7     | 9.2         | 92.0     | 8.9      | 0.68   | 7.59  |                   |
|        | 50         | 39.2        | 78.4     | 44.2        | 88.4     | 41.5        | 83.1     | 41.6     | 2.51   | 6.03  |                   |
|        | 250        | 251.5       | 100.6    | 217.7       | 87.1     | 230.0       | 92.0     | 233.0    | 17.14  | 7.35  |                   |
|        | 1000       | 1090.3      | 109.0    | 1011.2      | 101.1    | 987.0       | 98.7     | 1029.5   | 54.02  | 5.25  |                   |
|        | 1500       | 1628.6      | 108.6    | 1622.7      | 108.2    | 1547.4      | 103.2    | 1599.6   | 45.28  | 2.83  |                   |
|        | 2000       | 2411.6      | 120.6    | 2137.5      | 106.9    | 2326.5      | 116.3    | 2291.9   | 140.30 | 6.12  |                   |
| Phe    | 5          | 4.9         | 97.8     | 4.9         | 98.1     | 4.6         | 92.2     | 4.8      | 0.16   | 3.43  |                   |
|        | 10         | 10.8        | 107.6    | 10.2        | 102.2    | 10.1        | 100.8    | 10.4     | 0.36   | 3.47  |                   |
|        | 50         | 52.7        | 105.4    | 50.5        | 101.1    | 49.2        | 98.4     | 50.8     | 1.77   | 3.49  |                   |
|        | 250        | 265.7       | 106.3    | 269.3       | 107.7    | 244.3       | 97.7     | 259.7    | 13.52  | 5.21  |                   |
|        | 1000       | 1065.7      | 106.6    | 1021.3      | 102.1    | 951.1       | 95.1     | 1012.7   | 57.78  | 5.71  |                   |
|        | 1500       | 1507.0      | 100.5    | 1339.8      | 89.3     | 1389.0      | 92.6     | 1411.9   | 85.95  | 6.09  |                   |
|        | 2000       | 2170.6      | 108.5    | 1715.7      | 85.8     | 1953.8      | 97.7     | 1946.7   | 227.54 | 11.69 |                   |
| Pro    | 5          | 4.54        | 90.7     | 4.7         | 93.9     | 5.2         | 103.1    | 4.8      | 0.32   | 6.74  |                   |
|        | 10         | 10.51       | 105.1    | 10.7        | 107.1    | 10.5        | 104.8    | 10.6     | 0.13   | 1.18  |                   |
|        | 50         | 52.65       | 105.3    | 52.4        | 104.9    | 52.0        | 103.9    | 52.3     | 0.35   | 0.67  |                   |
|        | 250        | 246.72      | 98.7     | 242.0       | 96.8     | 257.3       | 102.9    | 248.7    | 7.83   | 3.15  |                   |
|        | 1000       | 954.15      | 95.4     | 919.0       | 91.9     | 938.6       | 93.9     | 937.3    | 17.64  | 1.88  |                   |
|        | 1500       | 1361.75     | 90.8     | 1367.3      | 91.2     | 1366.8      | 91.1     | 1365.3   | 3.06   | 0.22  |                   |
|        | 2000       | 1709.16     | 85.5     | 1743.3      | 87.2     | 1698.2      | 84.9     | 1716.9   | 23.53  | 1.37  |                   |
| Ser    | 5          | 6.0         | 119.6    | 5.2         | 103.2    | 5.1         | 102.2    | 5.4      | 0.49   | 9.02  |                   |
|        | 10         | 11.0        | 110.3    | 10.3        | 103.4    | 10.4        | 103.5    | 10.6     | 0.40   | 3.74  |                   |
|        | 50         | 51.2        | 102.4    | 53.4        | 106.8    | 49.1        | 98.1     | 51.2     | 2.17   | 4.23  |                   |
|        | 250        | 256.0       | 102.4    | 232.1       | 92.8     | 252.9       | 101.2    | 247.0    | 13.01  | 5.27  |                   |
|        | 1000       | 989.5       | 99.0     | 1005.5      | 100.6    | 994.7       | 99.5     | 996.5    | 8.15   | 0.82  |                   |
|        | 1500       | 1495.1      | 99.7     | 1421.3      | 94.8     | 1444.4      | 96.3     | 1453.6   | 37.79  | 2.60  |                   |
|        | 2000       | 1874.1      | 93.7     | 1710.6      | 85.5     | 1860.4      | 93.0     | 1815.1   | 90.71  | 5.00  |                   |

Dark green recovery (Rec.) cells indicate LCMS result within ±10% of expected target, light green within 20%, yellow within 30%, red >30% difference.

<sup>a</sup> Target concentration on X-axis

Table S3. Standard curve analysis – derivatized amino acids (Page 5 of 6)

| Target |            | Run A       |          | Run B       |          | Run C       |          | Analysis |        |      | Plot <sup>a</sup> |
|--------|------------|-------------|----------|-------------|----------|-------------|----------|----------|--------|------|-------------------|
| AA     | Conc. (µM) | Result (µM) | Rec. (%) | Result (µM) | Rec. (%) | Result (µM) | Rec. (%) | Mean     | SD     | %CV  |                   |
| Tau    | 5          | 4.6         | 92.7     | 5.1         | 102.8    | 5.2         | 103.5    | 5.0      | 0.30   | 6.03 |                   |
|        | 10         | 10.2        | 102.3    | 10.2        | 101.8    | 10.6        | 105.8    | 10.3     | 0.22   | 2.11 |                   |
|        | 50         | 54.1        | 108.2    | 51.7        | 103.5    | 52.4        | 104.9    | 52.7     | 1.20   | 2.27 |                   |
|        | 250        | 251.5       | 100.6    | 251.6       | 100.6    | 247.9       | 99.2     | 250.3    | 2.10   | 0.84 |                   |
|        | 1000       | 1070.1      | 107.0    | 1076.0      | 107.6    | 987.9       | 98.8     | 1044.7   | 49.26  | 4.72 |                   |
|        | 1500       | 1499.0      | 99.9     | 1427.3      | 95.2     | 1462.1      | 97.5     | 1462.8   | 35.84  | 2.45 |                   |
|        | 2000       | 1784.2      | 89.2     | 1800.8      | 90.0     | 1796.7      | 89.8     | 1793.9   | 8.66   | 0.48 |                   |
| Thr    | 5          | 4.0         | 79.4     | 3.7         | 73.0     | 3.8         | 75.7     | 3.8      | 0.16   | 4.24 |                   |
|        | 10         | 8.1         | 81.0     | 9.4         | 94.2     | 9.1         | 91.2     | 8.9      | 0.69   | 7.79 |                   |
|        | 50         | 48.4        | 96.8     | 48.0        | 96.1     | 49.4        | 98.8     | 48.6     | 0.71   | 1.47 |                   |
|        | 250        | 231.8       | 92.7     | 244.8       | 97.9     | 231.2       | 92.5     | 236.0    | 7.70   | 3.26 |                   |
|        | 1000       | 999.1       | 99.9     | 1044.6      | 104.5    | 933.9       | 93.4     | 992.5    | 55.64  | 5.61 |                   |
|        | 1500       | 1475.4      | 98.4     | 1501.4      | 100.1    | 1360.9      | 90.7     | 1445.9   | 74.71  | 5.17 |                   |
|        | 2000       | 1847.9      | 92.4     | 1912.9      | 95.6     | 1844.0      | 92.2     | 1868.3   | 38.68  | 2.07 |                   |
| Trp    | 5          | 4.7         | 94.3     | 4.8         | 95.3     | 4.7         | 94.0     | 4.7      | 0.03   | 0.65 |                   |
|        | 10         | 9.6         | 96.1     | 9.9         | 98.8     | 9.3         | 92.8     | 9.6      | 0.30   | 3.13 |                   |
|        | 50         | 51.2        | 102.5    | 48.5        | 96.9     | 48.2        | 96.5     | 49.3     | 1.68   | 3.40 |                   |
|        | 250        | 244.9       | 98.0     | 249.8       | 99.9     | 229.9       | 91.9     | 241.5    | 10.38  | 4.30 |                   |
|        | 1000       | 958.5       | 95.9     | 933.8       | 93.4     | 871.5       | 87.2     | 921.3    | 44.87  | 4.87 |                   |
|        | 1500       | 1350.9      | 90.1     | 1334.9      | 89.0     | 1308.6      | 87.2     | 1331.5   | 21.38  | 1.61 |                   |
|        | 2000       | 1897.1      | 94.9     | 1669.2      | 83.5     | 1622.4      | 81.1     | 1729.5   | 146.98 | 8.50 |                   |
| Tyr    | 5          | 4.3         | 85.9     | 5.2         | 104.1    | 4.9         | 96.9     | 4.8      | 0.45   | 9.48 |                   |
|        | 10         | 9.5         | 95.2     | 10.2        | 101.9    | 9.8         | 97.5     | 9.8      | 0.34   | 3.47 |                   |
|        | 50         | 50.0        | 100.0    | 52.1        | 104.2    | 50.0        | 99.9     | 50.7     | 1.22   | 2.40 |                   |
|        | 250        | 258.7       | 103.5    | 265.1       | 106.1    | 251.7       | 100.7    | 258.5    | 6.74   | 2.61 |                   |
|        | 1000       | 1009.6      | 101.0    | 1099.4      | 109.9    | 1003.8      | 100.4    | 1037.6   | 53.57  | 5.16 |                   |
|        | 1500       | 1559.4      | 104.0    | 1495.7      | 99.7     | 1452.3      | 96.8     | 1502.5   | 53.89  | 3.59 |                   |
|        | 2000       | 1955.3      | 97.8     | 1956.6      | 97.8     | 1765.7      | 88.3     | 1892.5   | 109.86 | 5.80 |                   |
| Val    | 5          | 4.0         | 80.6     | 3.4         | 68.5     | 4.0         | 79.3     | 3.8      | 0.33   | 8.67 |                   |
|        | 10         | 8.7         | 87.1     | 8.3         | 83.4     | 8.5         | 85.4     | 8.5      | 0.19   | 2.17 |                   |
|        | 50         | 45.0        | 89.9     | 45.6        | 91.1     | 44.7        | 89.5     | 45.1     | 0.42   | 0.93 |                   |
|        | 250        | 252.7       | 101.1    | 239.9       | 96.0     | 242.0       | 96.8     | 244.9    | 6.84   | 2.79 |                   |
|        | 1000       | 1027.7      | 102.8    | 978.8       | 97.9     | 985.3       | 98.5     | 997.3    | 26.58  | 2.67 |                   |
|        | 1500       | 1592.6      | 106.2    | 1486.6      | 99.1     | 1394.1      | 92.9     | 1491.1   | 99.34  | 6.66 |                   |
|        | 2000       | 1932.5      | 96.6     | 1942.4      | 97.1     | 1808.0      | 90.4     | 1894.3   | 74.91  | 3.95 |                   |

Dark green recovery (Rec.) cells indicate LCMS result within ±10% of expected target, light green within 20%, yellow within 30%, red >30% difference.

<sup>a</sup> Target concentration on X-axis



**Table S3. Standard curve analysis – derivatized amino acids (Page 6 of 6)**

| Target |            | Run A       |          | Run B       |          | Run C       |          | Analysis |        |      | Plot <sup>a</sup>                                                                   |
|--------|------------|-------------|----------|-------------|----------|-------------|----------|----------|--------|------|-------------------------------------------------------------------------------------|
| AA     | Conc. (µM) | Result (µM) | Rec. (%) | Result (µM) | Rec. (%) | Result (µM) | Rec. (%) | Mean     | SD     | %CV  |                                                                                     |
| HCT    | 5          | 5.3         | 105.0    | 5.9         | 117.9    | 5.7         | 113.5    | 5.6      | 0.33   | 5.88 | 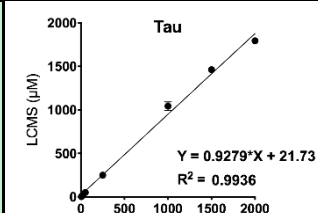 |
|        | 10         | 9.6         | 96.0     | 10.7        | 107.1    | 10.9        | 108.7    | 10.4     | 0.69   | 6.66 |                                                                                     |
|        | 50         | 46.9        | 93.8     | 50.2        | 100.5    | 54.3        | 108.6    | 50.5     | 3.70   | 7.33 |                                                                                     |
|        | 250        | 229.3       | 91.7     | 250.2       | 100.1    | 267.3       | 106.9    | 248.9    | 19.04  | 7.65 |                                                                                     |
|        | 1000       | 926.1       | 92.6     | 938.7       | 93.9     | 1090.4      | 109.0    | 985.0    | 91.47  | 9.29 |                                                                                     |
|        | 1500       | 1436.7      | 95.8     | 1413.4      | 94.2     | 1650.4      | 110.0    | 1500.2   | 130.65 | 8.71 |                                                                                     |
|        | 2000       | 1952.7      | 97.6     | 1923.1      | 96.2     | 2138.5      | 106.9    | 2004.8   | 116.74 | 5.82 |                                                                                     |

Dark green recovery (Rec.) cells indicate LCMS result within ±10% of expected target, light green within 20%, yellow within 30%, red >30% difference. HCT = homocitrulline

<sup>a</sup> Target concentration on X-axis

**Table S4. Standard curve analysis – underivatized isoleucine and *allo*-Ile.**

| Std # | STD Concentrations |        | LCMS Results |        |        | Recovery (%) |       | Inter-Run Statistics <sup>a</sup> |       |      | Plots      |                    |
|-------|--------------------|--------|--------------|--------|--------|--------------|-------|-----------------------------------|-------|------|------------|--------------------|
|       | [ILE]              | [allo] | Run          | [Ile]  | [allo] | Ile          | allo  | $\bar{x}$                         | SD    | %CV  | All Points | Low Concentrations |
| 1     | 500                | 5      | 1            | 474.0  | 5.4    | 94.8         | 108.4 | 4.9                               | 0.5   | 10.2 |            |                    |
|       |                    |        | 2            | 486.5  | 4.9    | 97.3         | 97.6  |                                   |       |      |            |                    |
|       |                    |        | 3            | 479.3  | 4.4    | 95.9         | 88.5  |                                   |       |      |            |                    |
| 2     | 500                | 10     | 1            | 457.3  | 9.8    | 91.5         | 97.9  | 9.1                               | 0.6   | 6.7  |            |                    |
|       |                    |        | 2            | 482.0  | 8.6    | 96.4         | 85.8  |                                   |       |      |            |                    |
|       |                    |        | 3            | 489.8  | 9.1    | 98.0         | 90.6  |                                   |       |      |            |                    |
| 3     | 500                | 50     | 1            | 462.9  | 46.8   | 92.6         | 93.7  | 48.6                              | 3.9   | 8.1  |            |                    |
|       |                    |        | 2            | 497.9  | 53.1   | 99.6         | 106.2 |                                   |       |      |            |                    |
|       |                    |        | 3            | 492.2  | 45.8   | 98.4         | 91.7  |                                   |       |      |            |                    |
| 4     | 500                | 100    | 1            | 464.0  | 101.3  | 92.8         | 101.3 | 102.9                             | 4.8   | 4.7  |            |                    |
|       |                    |        | 2            | 495.7  | 108.4  | 99.1         | 108.4 |                                   |       |      |            |                    |
|       |                    |        | 3            | 473.9  | 99.1   | 94.8         | 99.1  |                                   |       |      |            |                    |
| 5     | 500                | 500    | 1            | 484.4  | 517.8  | 96.9         | 103.6 | 520.0                             | 10.1  | 1.9  |            |                    |
|       |                    |        | 2            | 509.4  | 511.2  | 101.9        | 102.3 |                                   |       |      |            |                    |
|       |                    |        | 3            | 477.1  | 531.0  | 95.4         | 106.2 |                                   |       |      |            |                    |
| 6     | 5                  | 10     | 1            | 6.4    | 10.4   | 127.7        | 103.7 | 7.0                               | 0.6   | 8.0  |            |                    |
|       |                    |        | 2            | 7.2    | 10.5   | 144.9        | 104.9 |                                   |       |      |            |                    |
|       |                    |        | 3            | 7.5    | 10.0   | 149.0        | 100.0 |                                   |       |      |            |                    |
| 7     | 25                 | 10     | 1            | 24.4   | 10.9   | 97.8         | 109.4 | 25.7                              | 1.3   | 5.2  |            |                    |
|       |                    |        | 2            | 25.5   | 10.6   | 102.2        | 105.9 |                                   |       |      |            |                    |
|       |                    |        | 3            | 27.1   | 10.9   | 108.4        | 109.3 |                                   |       |      |            |                    |
| 8     | 500                | 10     | 1            | 468.0  | 10.1   | 93.6         | 101.0 | 484.5                             | 15.4  | 3.2  |            |                    |
|       |                    |        | 2            | 487.0  | 8.5    | 97.4         | 85.2  |                                   |       |      |            |                    |
|       |                    |        | 3            | 498.5  | 8.2    | 99.7         | 81.8  |                                   |       |      |            |                    |
| 9     | 1000               | 10     | 1            | 909.7  | 10.0   | 91.0         | 99.9  | 934.9                             | 22.8  | 2.4  |            |                    |
|       |                    |        | 2            | 954.0  | 8.9    | 95.4         | 88.8  |                                   |       |      |            |                    |
|       |                    |        | 3            | 941.0  | 9.2    | 94.1         | 91.6  |                                   |       |      |            |                    |
| 10    | 2000               | 10     | 1            | 1574.8 | 10.1   | 78.7         | 100.6 | 1681.7                            | 104.3 | 6.2  |            |                    |
|       |                    |        | 2            | 1687.2 | 10.0   | 84.4         | 99.7  |                                   |       |      |            |                    |
|       |                    |        | 3            | 1783.2 | 9.7    | 89.2         | 97.0  |                                   |       |      |            |                    |

<sup>a</sup> Statistics apply to *allo*-Ile for samples 1 to 5, and apply to Ile for samples 6 to 10.

**Table S5. Supplementary precision data – derivatized amino acids (control samples and plasma)**

| Interrun (Low)    |       |       |       |       |       |       |       |       |       |       |       |       |       |       |       |       |       |       |       |       |       |       |       |       |       |
|-------------------|-------|-------|-------|-------|-------|-------|-------|-------|-------|-------|-------|-------|-------|-------|-------|-------|-------|-------|-------|-------|-------|-------|-------|-------|-------|
| #                 | Ala   | Arg   | ASA   | Asn   | Asp   | Cit   | Cys   | Glu   | Gly   | Gln   | HCY   | His   | Ile   | Leu   | Lys   | Met   | Orn   | Phe   | Pro   | Ser   | Tau   | Thr   | Trp   | Tyr   | Val   |
| 1                 | 48.5  | 45.4  | 81.0  | 47.7  | 45.7  | 47.5  | 45.8  | 49.9  | 49.8  | 52.1  | 49.6  | 49.0  | 46.7  | 46.5  | 50.2  | 41.1  | 45.9  | 50.0  | 47.5  | 48.4  | 49.4  | 43.2  | 44.8  | 45.8  | 43.6  |
| 2                 | 45.9  | 43.8  | 73.9  | 46.0  | 48.0  | 46.0  | 47.6  | 50.6  | 48.2  | 48.1  | 50.4  | 47.9  | 46.2  | 41.3  | 47.2  | 45.7  | 47.6  | 51.5  | 50.9  | 52.3  | 47.6  | 46.3  | 44.6  | 46.6  | 41.4  |
| 3                 | 53.4  | 47.8  | 82.5  | 47.9  | 50.2  | 50.4  | 48.6  | 51.9  | 49.9  | 54.4  | 49.8  | 53.4  | 51.3  | 45.9  | 47.9  | 50.3  | 43.1  | 51.5  | 57.9  | 51.2  | 49.7  | 49.0  | 50.0  | 47.4  | 43.8  |
| 4                 | 50.3  | 51.9  | 78.9  | 49.4  | 52.8  | 50.2  | 47.4  | 47.5  | 53.2  | 48.9  | 55.6  | 52.9  | 48.8  | 52.8  | 47.4  | 46.0  | 38.1  | 52.2  | 49.5  | 47.1  | 50.8  | 46.7  | 51.0  | 46.5  | 42.0  |
| 5                 | 47.2  | 43.8  | 74.7  | 48.1  | 47.3  | 43.8  | 48.2  | 48.8  | 44.3  | 49.2  | 50.4  | 50.3  | 43.5  | 46.4  | 48.5  | 43.4  | 45.3  | 51.9  | 46.2  | 45.6  | 46.9  | 46.5  | 48.3  | 46.1  | 40.1  |
| 6                 | 42.2  | 46.4  | 82.4  | 46.6  | 44.6  | 46.2  | 51.6  | 50.6  | 44.8  | 52.6  | 56.2  | 54.6  | 48.7  | 42.3  | 48.1  | 42.1  | 41.0  | 46.6  | 49.0  | 47.0  | 47.0  | 41.2  | 44.1  | 46.1  | 43.2  |
| 7                 | 47.5  | 43.2  | 75.5  | 45.8  | 51.5  | 48.6  | 47.3  | 50.5  | 54.1  | 49.6  | 51.6  | 44.9  | 49.6  | 46.4  | 47.4  | 47.3  | 46.1  | 49.0  | 54.6  | 46.5  | 50.2  | 45.6  | 48.1  | 47.4  | 43.5  |
| 8                 | 46.0  | 47.2  | 84.6  | 46.3  | 45.9  | 45.5  | 44.2  | 47.7  | 46.4  | 44.4  | 50.2  | 44.9  | 44.5  | 42.5  | 44.9  | 40.5  | 39.9  | 44.9  | 48.1  | 46.7  | 43.9  | 43.9  | 45.3  | 44.4  | 41.0  |
| 9                 | 49.0  | 42.3  | NP    | 48.6  | 50.7  | 46.2  | 49.5  | 51.5  | 49.2  | NP    | 50.7  | 47.0  | 49.2  | 42.3  | 49.1  | 40.4  | 43.4  | 47.2  | 47.0  | 48.2  | 41.6  | 45.8  | 44.9  | 43.7  | 42.3  |
| 10                | 44.5  | 47.5  | NP    | 49.6  | 36.7  | 35.5  | 45.8  | 47.6  | 44.8  | NP    | 42.2  | 41.0  | 50.3  | 51.2  | 54.9  | 45.6  | 39.5  | 44.0  | 43.3  | 42.2  | 47.3  | 40.0  | 36.5  | 39.1  | 36.2  |
| $\bar{x}$         | 47.4  | 45.9  | 79.2  | 47.6  | 47.3  | 46.0  | 47.6  | 49.7  | 48.5  | 49.9  | 50.7  | 48.6  | 47.9  | 45.8  | 48.5  | 44.3  | 43.0  | 48.9  | 49.4  | 47.5  | 47.4  | 44.8  | 45.8  | 45.3  | 41.7  |
| SD                | 3.1   | 2.9   | 4.1   | 1.4   | 4.6   | 4.2   | 2.1   | 1.6   | 3.4   | 3.1   | 3.8   | 4.3   | 2.6   | 3.9   | 2.6   | 3.3   | 3.2   | 3.0   | 4.2   | 2.8   | 2.9   | 2.7   | 4.1   | 2.5   | 2.3   |
| %CV               | 6.6   | 6.2   | 5.2   | 2.9   | 9.8   | 9.2   | 4.3   | 3.3   | 7.1   | 6.2   | 7.5   | 8.9   | 5.4   | 8.5   | 5.4   | 7.4   | 7.5   | 6.2   | 8.5   | 5.9   | 6.1   | 6.1   | 8.9   | 5.4   | 5.5   |
| Interrun (High)   |       |       |       |       |       |       |       |       |       |       |       |       |       |       |       |       |       |       |       |       |       |       |       |       |       |
| #                 | Ala   | Arg   | ASA   | Asn   | Asp   | Cit   | Cys   | Glu   | Gly   | Gln   | HCY   | His   | Ile   | Leu   | Lys   | Met   | Orn   | Phe   | Pro   | Ser   | Tau   | Thr   | Trp   | Tyr   | Val   |
| 1                 | 244.8 | 223.5 | 794.6 | 264.1 | 260.2 | 254.2 | 244.8 | 245.0 | 240.0 | 542.8 | 241.3 | 240.2 | 230.5 | 240.5 | 254.8 | 214.4 | 256.4 | 257.0 | 247.7 | 243.8 | 261.0 | 254.3 | 246.3 | 244.8 | 226.1 |
| 2                 | 256.8 | 231.1 | 761.0 | 253.3 | 255.2 | 238.5 | 252.6 | 265.7 | 256.2 | 514.6 | 278.9 | 255.8 | 262.6 | 246.7 | 244.4 | 231.3 | 249.0 | 271.9 | 236.7 | 260.9 | 241.5 | 241.7 | 246.0 | 263.7 | 237.3 |
| 3                 | 261.8 | 231.7 | 786.8 | 246.3 | 246.2 | 240.1 | 223.7 | 243.1 | 242.1 | 527.2 | 259.7 | 234.7 | 270.8 | 275.7 | 225.0 | 228.0 | 236.4 | 256.9 | 236.5 | 242.7 | 234.5 | 250.5 | 245.1 | 248.6 | 227.8 |
| 4                 | 256.6 | 247.3 | 787.6 | 247.3 | 249.3 | 258.1 | 242.3 | 244.9 | 276.0 | 497.1 | 257.7 | 249.9 | 252.1 | 260.2 | 243.6 | 241.9 | 212.5 | 270.4 | 240.4 | 236.2 | 240.4 | 231.3 | 252.0 | 249.4 | 216.1 |
| 5                 | 261.2 | 235.8 | 757.1 | 249.4 | 257.4 | 222.4 | 232.0 | 255.7 | 241.4 | 531.4 | 227.2 | 240.9 | 241.6 | 267.3 | 244.3 | 230.8 | 229.3 | 267.7 | 227.2 | 251.1 | 250.1 | 237.3 | 255.1 | 251.7 | 234.9 |
| 6                 | 240.4 | 244.2 | 702.7 | 258.3 | 229.9 | 242.2 | 232.6 | 246.4 | 253.9 | 425.9 | 240.8 | 233.6 | 262.1 | 235.3 | 246.5 | 240.4 | 213.3 | 243.1 | 232.1 | 256.5 | 233.6 | 233.9 | 242.4 | 243.4 | 231.1 |
| 7                 | 255.0 | 246.1 | 762.3 | 253.3 | 277.8 | 254.9 | 227.1 | 243.3 | 267.8 | 453.4 | 253.4 | 235.9 | 266.4 | 252.5 | 257.8 | 238.2 | 263.0 | 257.0 | 263.7 | 242.7 | 233.7 | 237.4 | 256.7 | 238.1 | 236.5 |
| 8                 | 250.3 | 224.3 | 710.4 | 247.0 | 248.8 | 239.0 | 251.2 | 246.1 | 240.0 | 538.3 | 248.8 | 235.9 | 238.1 | 230.6 | 235.4 | 223.7 | 267.9 | 244.7 | 241.9 | 247.7 | 222.1 | 242.6 | 239.8 | 233.1 | 228.0 |
| 9                 | 255.4 | 245.4 | NP    | 252.3 | 254.7 | 241.1 | 242.2 | 261.3 | 242.1 | NP    | 240.1 | 244.0 | 252.3 | 252.8 | 251.8 | 215.3 | 243.6 | 263.5 | 240.3 | 233.7 | 222.4 | 242.3 | 232.4 | 217.0 | 222.9 |
| 10                | 234.9 | 260.3 | NP    | 245.4 | 255.1 | 232.3 | 233.9 | 233.2 | 231.1 | NP    | 216.7 | 232.0 | 273.6 | 249.3 | 260.5 | 218.4 | 238.1 | 236.5 | 238.4 | 241.8 | 203.0 | 223.0 | 230.3 | 228.7 | 244.4 |
| $\bar{x}$         | 251.7 | 239.0 | 757.8 | 251.7 | 253.4 | 242.3 | 238.2 | 248.5 | 249.1 | 503.8 | 246.5 | 240.3 | 255.0 | 251.1 | 246.4 | 228.2 | 240.9 | 256.9 | 240.5 | 245.7 | 234.2 | 239.4 | 244.6 | 241.8 | 230.5 |
| SD                | 9.0   | 11.7  | 34.6  | 5.9   | 12.1  | 10.9  | 9.9   | 9.7   | 14.1  | 42.8  | 17.5  | 7.7   | 14.6  | 14.0  | 10.7  | 10.2  | 19.0  | 12.1  | 9.9   | 8.5   | 16.1  | 9.1   | 8.8   | 13.2  | 8.1   |
| %CV               | 3.6   | 4.9   | 4.6   | 2.4   | 4.8   | 4.5   | 4.1   | 3.9   | 5.7   | 8.5   | 7.1   | 3.2   | 5.7   | 5.6   | 4.3   | 4.4   | 7.9   | 4.7   | 4.1   | 3.5   | 6.9   | 3.8   | 3.6   | 5.5   | 3.5   |
| Interrun (Plasma) |       |       |       |       |       |       |       |       |       |       |       |       |       |       |       |       |       |       |       |       |       |       |       |       |       |
| #                 | Ala   | Arg   | ASA   | Asn   | Asp   | Cit   | Cys   | Glu   | Gly   | Gln   | HCY   | His   | Ile   | Leu   | Lys   | Met   | Orn   | Phe   | Pro   | Ser   | Tau   | Thr   | Trp   | Tyr   | Val   |
| 1                 | 217.2 | 98.4  | NP    | 19.8  | 24.1  | 13.3  | 40.4  | 52.1  | 367.3 | 622.8 | NP    | 87.3  | 55.4  | 101.2 | 170.4 | 31.0  | 105.2 | 119.9 | 152.5 | 129.6 | 28.3  | 175.3 | 51.9  | 59.9  | 305.8 |
| 2                 | 241.5 | 104.3 | NP    | 23.8  | 29.5  | 14.3  | 39.6  | 59.3  | 310.4 | 617.0 | NP    | 84.2  | 54.2  | 110.3 | 177.9 | 31.9  | 109.1 | 118.4 | 127.0 | 148.7 | 30.5  | 184.0 | 51.3  | 61.2  | 300.0 |
| 3                 | 240.1 | 115.9 | NP    | 25.7  | 33.4  | 14.0  | 34.4  | 52.1  | 299.2 | 567.5 | NP    | 88.6  | 61.2  | 99.2  | 169.5 | 29.4  | 98.4  | 124.9 | 133.2 | 129.6 | 26.3  | 178.9 | 47.1  | 59.9  | 300.5 |
| $\bar{x}$         | 232.9 | 106.2 | NP    | 23.1  | 29.0  | 13.9  | 38.1  | 54.5  | 325.6 | 602.4 | NP    | 86.7  | 56.9  | 103.6 | 172.6 | 30.8  | 104.2 | 121.1 | 137.6 | 136.0 | 28.4  | 179.4 | 50.1  | 60.4  | 302.1 |
| SD                | 13.6  | 8.9   | NP    | 3.0   | 4.7   | 0.5   | 3.3   | 4.2   | 36.5  | 30.4  | NP    | 2.2   | 3.7   | 5.9   | 4.6   | 1.3   | 5.5   | 3.4   | 13.3  | 11.0  | 2.1   | 4.4   | 2.6   | 0.8   | 3.2   |
| %CV               | 5.8   | 8.4   | NP    | 13.0  | 16.2  | 3.7   | 8.5   | 7.7   | 11.2  | 5.0   | NP    | 2.6   | 6.5   | 5.7   | 2.7   | 4.1   | 5.2   | 2.8   | 9.7   | 8.1   | 7.4   | 2.4   | 5.2   | 1.3   | 1.1   |
| Intrarun (Low)    |       |       |       |       |       |       |       |       |       |       |       |       |       |       |       |       |       |       |       |       |       |       |       |       |       |
| #                 | Ala   | Arg   | ASA   | Asn   | Asp   | Cit   | Cys   | Glu   | Gly   | Gln   | HCY   | His   | Ile   | Leu   | Lys   | Met   | Orn   | Phe   | Pro   | Ser   | Tau   | Thr   | Trp   | Tyr   | Val   |
| 1                 | 53.4  | 47.8  | 74.7  | 47.9  | 50.2  | 50.4  | 48.6  | 51.9  | 49.9  | 49.2  | 49.8  | 53.4  | 51.3  | 45.9  | 47.9  | 50.3  | 43.1  | 51.5  | 57.9  | 51.2  | 49.7  | 49.0  | 50.0  | 47.4  | 43.8  |
| 2                 | 55.3  | 46.8  | 72.8  | 51.3  | 48.7  | 49.6  | 47.2  | 48.6  | 48.3  | 48.3  | 51.0  | 49.2  | 50.6  | 51.6  | 48.5  | 43.8  | 43.5  | 52.7  | 55.7  | 50.7  | 51.3  | 50.0  | 51.8  | 50.0  | 43.8  |
| 3                 | 53.8  | 43.3  | 73.6  | 50.0  | 49.2  | 48.2  | 46.1  | 47.3  | 48.3  | 46.6  | 48.3  | 50.8  | 51.4  | 55.2  | 46.4  | 46.0  | 44.7  | 52.7  | 50.7  | 50.4  | 51.1  | 43.6  | 47.7  | 46.0  | 44.2  |
| $\bar{x}$         | 54.2  | 46.0  | 73.7  | 49.7  | 49.3  | 49.4  | 47.3  | 49.3  | 48.8  | 48.0  | 49.7  | 51.1  | 51.1  | 50.9  | 47.6  | 46.7  | 43.8  | 52.3  | 54.8  | 50.8  | 50.7  | 47.5  | 49.8  | 47.8  | 43.9  |
| SD                | 1.0   | 2.4   | 1.0   | 1.7   | 0.7   | 1.1   | 1.2   | 2.4   | 0.9   | 1.3   | 1.3   | 2.1   | 0.4   | 4.7   | 1.1   | 3.3   | 0.8   | 0.7   | 3.7   | 0.4   | 0.9   | 3.4   | 2.0   | 2.0   | 0.2   |
| %CV               | 1.8   | 5.1   | 1.3   | 3.4   | 1.5   | 2.2   | 2.6   | 4.8   | 1.9   | 2.8   | 2.7   | 4.2   | 0.8   | 9.3   | 2.3   | 7.1   | 1.9   | 1.3   | 6.7   | 0.8   | 1.7   | 7.2   | 4.1   | 4.3   | 0.5   |
| Intrarun (High)   |       |       |       |       |       |       |       |       |       |       |       |       |       |       |       |       |       |       |       |       |       |       |       |       |       |
| #                 | Ala   | Arg   | ASA   | Asn   | Asp   | Cit   | Cys   | Glu   | Gly   | Gln   | HCY   | His   | Ile   | Leu   | Lys   | Met   | Orn   | Phe   | Pro   | Ser   | Tau   | Thr   | Trp   | Tyr   | Val   |
| 1                 | 240.4 | 244.2 | 761.0 | 258.3 | 229.9 | 242.2 | 232.6 | 246.4 | 253.9 | 514.6 | 240.8 | 233.6 | 262.1 | 235.3 | 254.9 | 240.4 | 213.3 | 243.1 | 232.1 | 256.5 | 233.6 | 233.9 | 242.4 | 243.4 | 231.1 |
| 2                 | 242.6 | 275.6 | 811.8 | 249.2 | 251.0 | 237.3 | 242.7 | 261.1 | 248.2 | 504.2 | 245.7 | 248.8 | 265.6 | 249.9 | 245.6 | 232.0 | 270.5 | 256.4 | 243.5 | 275.1 | 238.9 | 229.4 | 242.7 | 247.4 | 234.8 |
| 3                 | 244.7 | 244.1 | 829.6 | 261.3 | 237.6 | 272.2 | 237.5 | 265.7 | 254.9 | 536.1 | 250.4 | 242.4 | 258.5 | 230.5 | 245.6 | 239.4 | 218.2 | 249.9 | 238.1 | 252.4 | 248.4 | 234.6 | 254.0 | 235.3 | 229.2 |
| $\bar{x}$         | 242.5 | 254.6 | 800.8 | 256.3 | 239.5 | 250.6 | 237.6 | 257.7 | 252.3 | 518.3 | 245.6 | 241.6 | 262.0 | 238.6 | 248.7 | 237.3 | 234.0 | 249.8 | 237.9 | 261.3 | 240.3 | 232.6 | 246.4 | 242.0 | 231.7 |
| SD                | 2.1   | 18.2  | 35.6  | 6.3   | 10.6  | 18.9  | 5.0   | 10.1  | 3.6   | 16.3  | 4.8   | 7.6   | 3.6   | 10.1  | 5.4   | 4.6   | 31.7  | 6.7   | 5.7   | 12.1  | 7.5   | 2.8   | 6.6   | 6.2   | 2.9   |
| %CV               | 0.9   | 7.1   | 4.4   | 2.5   | 4.4   | 7.6   | 2.1   | 3.9   | 1.4   | 3.1   | 2.0   | 3.1   | 1.4   | 4.2   | 2.2   | 1.9   | 13.5  | 2.7   | 2.4   | 4.6   | 3.1   | 1.2   | 2.7   | 2.5   | 1.2   |
| Intrarun (Plasma) |       |       |       |       |       |       |       |       |       |       |       |       |       |       |       |       |       |       |       |       |       |       |       |       |       |
| #                 | Ala   | Arg   | ASA   | Asn   | Asp   | Cit   | Cys   | Glu   | Gly   | Gln   | HCY   | His   | Ile   | Leu   | Lys   | Met   | Orn   | Phe   | Pro   | Ser   | Tau   | Thr   | Trp   | Tyr   | Val   |
| 1                 | 217.2 | 98.4  | 54.0  | 19.8  | 24.1  | 13.3  | 40.4  | 52.1  | 367.3 | 622.8 | NP    | 87.3  | 55.4  | 101.2 | 170.4 | 170.4 | 105.2 | 119.9 | 152.5 | 129.6 | 28.3  | 175.3 | 51.9  | 59.9  | 305.8 |
| 2                 | 210.3 | 95.5  | 51.7  | 20.6  | 25.9  | 12.7  | 40.4  | 51.7  | 311.3 | 652.7 | NP    | 88.1  | 52.0  | 91.3  | 165.0 | 177.9 | 98.4  | 109.7 | 147   |       |       |       |       |       |       |

**Table S6. Supplementary precision data – underivatized Isoleucine and *allo*-Ile.**

| #         | Interrun Low |            | Interrun High |            | Intrarun Low |            | Intrarun High |            |
|-----------|--------------|------------|---------------|------------|--------------|------------|---------------|------------|
|           | allo         | ile        | allo          | ile        | allo         | ile        | allo          | ile        |
| 1         | 27.5         | 24.0       | 263.5         | 118.3      | 27.0         | 25.7       | 263.5         | 118.3      |
| 2         | 27.0         | 25.7       | 266.8         | 122.5      | 27.1         | 26.0       | 285.8         | 121.2      |
| 3         | 22.5         | 27.5       | 264.1         | 118.2      | 25.6         | 24.6       | 276.4         | 118.1      |
| $\bar{x}$ | 25.7         | 25.7       | 264.8         | 119.7      | 26.6         | 25.4       | 275.2         | 119.2      |
| SD        | 2.8          | 1.7        | 1.7           | 2.5        | 0.9          | 0.7        | 11.2          | 1.7        |
| %CV       | <b>10.8</b>  | <b>6.8</b> | <b>0.7</b>    | <b>2.1</b> | <b>3.2</b>   | <b>2.9</b> | <b>4.1</b>    | <b>1.4</b> |

Data based on low and high control samples prepared in 0.1 M HCl

**Table S7. Method correlation – patient plasma (Page 1 of 4).**

| #  | Ala                        |                    |             | Arg                        |                    |             | Asn                        |                    |             | Cit                        |                    |             | Gln                        |                    |             |
|----|----------------------------|--------------------|-------------|----------------------------|--------------------|-------------|----------------------------|--------------------|-------------|----------------------------|--------------------|-------------|----------------------------|--------------------|-------------|
|    | IEX/<br>UPLC<br>( $\mu$ M) | LCMS<br>( $\mu$ M) | Rec.<br>(%) | IEX/<br>UPLC<br>( $\mu$ M) | LCMS<br>( $\mu$ M) | Rec.<br>(%) | IEX/<br>UPLC<br>( $\mu$ M) | LCMS<br>( $\mu$ M) | Rec.<br>(%) | IEX/<br>UPLC<br>( $\mu$ M) | LCMS<br>( $\mu$ M) | Rec.<br>(%) | IEX/<br>UPLC<br>( $\mu$ M) | LCMS<br>( $\mu$ M) | Rec.<br>(%) |
| 1  | 133.4                      | 140.1              | 105.0       | 77.5                       | 85.3               | 110.1       | 26.1                       | 33.7               | 128.9       | 24.8                       | 26.7               | 107.6       | 389.7                      | 395.9              | 101.6       |
| 2  | 106.8                      | 106.2              | 99.5        | 109.6                      | 110.4              | 100.7       | 55.4                       | 65.6               | 118.4       | 41.2                       | 39.5               | 96.0        | 419.9                      | 407.3              | 97.0        |
| 3  | 203.1                      | 195.9              | 96.5        | 152.3                      | 153.9              | 101.1       | 54.9                       | 64.9               | 118.3       | 44.3                       | 43.2               | 97.5        | 373.5                      | 373.9              | 100.1       |
| 4  | 348.0                      | 363.2              | 104.4       | 96.2                       | 96.0               | 99.8        | 31.9                       | 44.1               | 138.2       | 30.9                       | 31.7               | 102.7       | 512.9                      | 536.6              | 104.6       |
| 5  | 457.4                      | 476.9              | 104.3       | 140.4                      | 150.0              | 106.9       | 24.3                       | 29.3               | 120.5       | 23.3                       | 23.3               | 100.0       | 634.8                      | 662.8              | 104.4       |
| 6  | 344.4                      | 383.4              | 111.3       | 98.8                       | 110.8              | 112.2       | 25.5                       | 35.4               | 138.8       | 20.9                       | 23.2               | 110.9       | 561.3                      | 601.1              | 107.1       |
| 7  | 226.2                      | 220.2              | 97.3        | 50.5                       | 53.0               | 105.0       | 35.1                       | 35.7               | 101.8       | 14.6                       | 17.2               | 117.6       | 443.1                      | 450.4              | 101.7       |
| 8  | 240.9                      | 239.2              | 99.3        | 132.2                      | 128.9              | 97.5        | 54.9                       | 57.6               | 105.0       | 46.7                       | 50.0               | 107.2       | 890.5                      | 999.2              | 112.2       |
| 9  | 474.8                      | 488.4              | 102.8       | 130.3                      | 128.0              | 98.3        | 54.4                       | 59.4               | 109.1       | 17.7                       | 23.6               | 132.9       | 652.5                      | 689.0              | 105.6       |
| 10 | 329.6                      | 306.2              | 92.9        | 98.4                       | 90.5               | 91.9        | 29.6                       | 32.8               | 110.6       | 21.3                       | 26.5               | 124.5       | 364.2                      | 406.4              | 111.6       |
| 11 | 334.3                      | 348.3              | 104.2       | 93.0                       | 87.5               | 94.1        | 43.4                       | 51.6               | 118.8       | 10.4                       | 11.1               | 106.7       | 679.5                      | 726.7              | 107.0       |
| 12 | 476.1                      | 421.2              | 88.5        | 83.3                       | 87.6               | 105.1       | 30.8                       | 40.0               | 129.6       | 26.2                       | 30.5               | 116.3       | 605.7                      | 572.6              | 94.5        |
| 13 | 387.7                      | 375.4              | 96.8        | 133.7                      | 145.5              | 108.9       | 31.2                       | 35.2               | 112.8       | 23.8                       | 25.9               | 108.8       | 529.0                      | 490.3              | 92.7        |
| 14 | 159.7                      | 159.7              | 100.0       | 65.8                       | 70.6               | 107.3       | 46.9                       | 50.8               | 108.5       | 13.5                       | 16.1               | 119.4       | 660.0                      | 789.0              | 119.5       |
| 15 | 394.8                      | 394.3              | 99.9        | 112.7                      | 108.5              | 96.3        | 32.5                       | 38.4               | 118.0       | 17.7                       | 21.0               | 118.9       | 593.0                      | 598.7              | 101.0       |
| 16 | 456.0                      | 445.6              | 97.7        | 72.4                       | 76.4               | 105.5       | 48.9                       | 50.5               | 103.3       | 25.2                       | 23.0               | 91.5        | 680.3                      | 575.9              | 84.7        |
| 17 | 507.9                      | 532.1              | 104.8       | 132.4                      | 131.2              | 99.1        | 57.0                       | 60.6               | 106.5       | 28.4                       | 30.2               | 106.5       | 647.4                      | 545.7              | 84.3        |
| 18 | 380.8                      | 378.8              | 99.5        | 74.5                       | 75.0               | 100.7       | 50.8                       | 51.9               | 102.2       | 15.1                       | 15.5               | 102.9       | 644.2                      | 582.5              | 90.4        |
| 19 | 275.9                      | 294.4              | 106.7       | 100.2                      | 105.1              | 104.9       | 93.9                       | 70.6               | 75.2        | 15.7                       | 16.0               | 102.3       | 566.8                      | 518.8              | 91.5        |
| 20 | 239.3                      | 208.0              | 86.9        | 95.2                       | 106.7              | 112.1       | 16.0                       | 15.3               | 96.2        | 12.2                       | 12.3               | 100.8       | 419.8                      | 442.9              | 105.5       |
| 21 | 446.8                      | 406.8              | 91.0        | 139.5                      | 134.4              | 96.4        | 67.1                       | 68.8               | 102.4       | 20.5                       | 18.4               | 89.6        | 793.4                      | 778.1              | 98.1        |
| 22 | 251.8                      | 206.7              | 82.1        | 142.0                      | 124.3              | 87.5        | 21.9                       | 19.9               | 90.9        | 10.9                       | 9.4                | 86.7        | 401.6                      | 394.4              | 98.2        |
| 23 | 320.4                      | 273.8              | 85.5        | 100.4                      | 144.9              | 144.3       | 26.6                       | 24.3               | 91.2        | 10.6                       | 8.6                | 81.3        | 547.3                      | 565.1              | 103.3       |
| 24 | 377.1                      | 339.7              | 90.1        | 205.9                      | 194.5              | 94.5        | 21.5                       | 18.8               | 87.4        | 13.1                       | 11.7               | 88.8        | 410.5                      | 403.5              | 98.3        |
| 25 | 169.5                      | 150.7              | 88.9        | 117.1                      | 86.5               | 73.9        | 15.9                       | 13.1               | 82.5        | 5.4                        | 5.0                | 93.8        | 360.1                      | 357.6              | 99.3        |
| 26 | 139.9                      | 107.5              | 76.8        | 61.2                       | 69.8               | 114.1       | 12.9                       | 9.5                | 73.5        | 6.7                        | 6.7                | 100.8       | 246.2                      | 271.3              | 110.2       |
| 27 | 189.6                      | 172.6              | 91.0        | 34.0                       | 60.9               | 179.3       | 16.7                       | 14.8               | 88.4        | 3.6                        | 3.2                | 87.3        | 305.5                      | 364.8              | 119.4       |
| 28 | 341.8                      | 326.4              | 95.5        | 60.5                       | 73.4               | 121.5       | 24.9                       | 23.5               | 94.5        | 13.7                       | 13.9               | 101.7       | 609.8                      | 696.0              | 114.1       |
| 29 | 293.3                      | 273.7              | 93.3        | 81.4                       | 80.7               | 99.1        | 45.7                       | 47.4               | 103.7       | 11.0                       | 9.1                | 82.5        | 439.2                      | 490.9              | 111.8       |
| 30 | 214.9                      | 217.2              | 101.1       | 94.6                       | 98.4               | 104.0       | 20.6                       | 19.8               | 96.5        | 12.0                       | 13.3               | 110.5       | 520.4                      | 622.8              | 119.7       |

Patient samples are numbered 1 to 30 (1-19 IEX tested samples, 20 to 30 UPLC tested samples).

**Table S7. Method correlation – patient plasma (Page 2 of 4).**

| #  | Gly                        |                    |             | His                        |                    |             | Ile <sup>a</sup>           |                    |             | Leu                        |                    |             | Lys                        |                    |             |
|----|----------------------------|--------------------|-------------|----------------------------|--------------------|-------------|----------------------------|--------------------|-------------|----------------------------|--------------------|-------------|----------------------------|--------------------|-------------|
|    | IEX/<br>UPLC<br>( $\mu$ M) | LCMS<br>( $\mu$ M) | Rec.<br>(%) | IEX/<br>UPLC<br>( $\mu$ M) | LCMS<br>( $\mu$ M) | Rec.<br>(%) | IEX/<br>UPLC<br>( $\mu$ M) | LCMS<br>( $\mu$ M) | Rec.<br>(%) | IEX/<br>UPLC<br>( $\mu$ M) | LCMS<br>( $\mu$ M) | Rec.<br>(%) | IEX/<br>UPLC<br>( $\mu$ M) | LCMS<br>( $\mu$ M) | Rec.<br>(%) |
| 1  | 184.2                      | 192.8              | 104.7       | 60.3                       | 62.0               | 102.9       | -                          | -                  | -           | 611.8                      | 613.2              | 100.2       | 63.8                       | 62.6               | 98.1        |
| 2  | 311.1                      | 307.2              | 98.7        | 74.7                       | 65.2               | 87.3        | -                          | -                  | -           | 774.1                      | 725.1              | 93.7        | 110.0                      | 106.4              | 96.7        |
| 3  | 289.0                      | 291.0              | 100.7       | 79.4                       | 69.1               | 87.1        | -                          | -                  | -           | 862.5                      | 789.3              | 91.5        | 170.8                      | 162.7              | 95.3        |
| 4  | 435.4                      | 461.4              | 106.0       | 84.6                       | 80.1               | 94.7        | 41.3                       | 49.5               | 119.8       | 107.2                      | 102.8              | 95.8        | 155.8                      | 160.5              | 103.0       |
| 5  | 295.7                      | 307.5              | 104.0       | 87.0                       | 84.1               | 96.7        | 88.3                       | 99.9               | 113.2       | 168.0                      | 171.3              | 102.0       | 223.6                      | 239.1              | 106.9       |
| 6  | 484.3                      | 498.8              | 103.0       | 90.2                       | 81.9               | 90.9        | 60.0                       | 70.5               | 117.5       | 117.9                      | 115.3              | 97.8        | 148.8                      | 157.6              | 105.9       |
| 7  | 359.2                      | 367.1              | 102.2       | 63.4                       | 73.2               | 115.5       | 21.0                       | 28.5               | 136.0       | 43.9                       | 44.4               | 101.1       | 87.0                       | 89.2               | 102.5       |
| 8  | 282.6                      | 275.7              | 97.6        | 72.1                       | 80.3               | 111.3       | 71.1                       | 74.1               | 104.1       | 132.3                      | 131.7              | 99.5        | 185.0                      | 179.9              | 97.2        |
| 9  | 262.5                      | 248.4              | 94.6        | 77.6                       | 83.2               | 107.2       | 61.7                       | 65.8               | 106.7       | 116.7                      | 108.5              | 92.9        | 204.6                      | 212.0              | 103.6       |
| 10 | 261.9                      | 230.7              | 88.1        | 49.1                       | 56.3               | 114.7       | 59.6                       | 62.1               | 104.2       | 118.8                      | 121.4              | 102.2       | 84.6                       | 92.2               | 109.1       |
| 11 | 299.7                      | 280.5              | 93.6        | 74.9                       | 81.4               | 108.7       | 62.7                       | 67.5               | 107.7       | 153.1                      | 161.8              | 105.7       | 172.6                      | 171.5              | 99.4        |
| 12 | 578.7                      | 567.2              | 98.0        | 82.3                       | 103.2              | 125.4       | 51.8                       | 60.0               | 115.8       | 103.0                      | 101.8              | 98.8        | 180.2                      | 186.6              | 103.6       |
| 13 | 256.3                      | 243.2              | 94.9        | 41.5                       | 58.5               | 141.1       | -                          | -                  | -           | 149.7                      | 120.6              | 80.5        | 225.5                      | 226.5              | 100.4       |
| 14 | 305.0                      | 317.8              | 104.2       | 86.8                       | 95.8               | 110.3       | 23.2                       | 29.1               | 125.4       | 57.1                       | 62.7               | 109.7       | 113.0                      | 121.2              | 107.3       |
| 15 | 276.5                      | 282.0              | 102.0       | 96.8                       | 103.1              | 106.5       | 142.0                      | 127.4              | 89.7        | 243.5                      | 256.3              | 105.2       | 228.3                      | 217.0              | 95.1        |
| 16 | 331.1                      | 306.4              | 92.5        | 78.3                       | 74.3               | 94.9        | 73.4                       | 74.5               | 101.5       | 119.9                      | 110.2              | 91.9        | 153.7                      | 136.9              | 89.1        |
| 17 | 587.2                      | 534.6              | 91.0        | 74.2                       | 81.7               | 110.1       | 84.6                       | 89.8               | 106.2       | 141.3                      | 141.4              | 100.1       | 195.3                      | 186.3              | 95.4        |
| 18 | 264.8                      | 257.6              | 97.3        | 69.9                       | 67.6               | 96.7        | 50.2                       | 56.9               | 113.4       | 92.9                       | 88.9               | 95.8        | 151.7                      | 157.5              | 103.9       |
| 19 | 290.0                      | 291.0              | 100.3       | 75.0                       | 78.1               | 104.0       | 173.7                      | 174.7              | 100.6       | 278.0                      | 273.5              | 98.4        | 250.9                      | 252.0              | 100.4       |
| 20 | 292.6                      | 229.8              | 78.5        | 102.0                      | 102.7              | 100.8       | 71.6                       | 71.1               | 99.2        | 156.9                      | 159.8              | 101.8       | 141.2                      | 171.1              | 121.2       |
| 21 | 423.1                      | 314.8              | 74.4        | 106.1                      | 105.0              | 99.0        | 111.8                      | 109.1              | 97.6        | 198.6                      | 191.1              | 96.2        | 187.8                      | 197.2              | 105.0       |
| 22 | 240.2                      | 144.0              | 60.0        | 79.0                       | 79.8               | 101.0       | 66.1                       | 65.8               | 99.5        | 147.0                      | 126.5              | 86.1        | 99.5                       | 117.9              | 118.5       |
| 23 | 398.6                      | 295.6              | 74.2        | 83.4                       | 81.6               | 97.8        | 68.2                       | 65.0               | 95.4        | 137.2                      | 133.5              | 97.3        | 181.5                      | 227.8              | 125.5       |
| 24 | 226.3                      | 152.6              | 67.4        | 81.9                       | 80.4               | 98.2        | 134.8                      | 123.5              | 91.7        | 298.8                      | 302.5              | 101.2       | 141.7                      | 184.1              | 129.9       |
| 25 | 177.5                      | 120.3              | 67.8        | 51.7                       | 54.3               | 105.1       | 88.7                       | 80.2               | 90.4        | 203.8                      | 210.9              | 103.5       | 87.9                       | 106.1              | 120.7       |
| 26 | 172.2                      | 123.8              | 71.9        | 50.8                       | 52.7               | 103.9       | 50.7                       | 56.1               | 110.7       | 138.4                      | 124.0              | 89.6        | 67.4                       | 73.6               | 109.2       |
| 27 | 152.1                      | 128.7              | 84.7        | 46.4                       | 52.9               | 113.9       | 52.3                       | 58.8               | 112.6       | 111.0                      | 104.6              | 94.2        | 79.1                       | 88.0               | 111.3       |
| 28 | 427.2                      | 452.3              | 105.9       | 117.5                      | 117.2              | 99.7        | 73.0                       | 77.1               | 105.7       | 98.5                       | 91.5               | 92.9        | 230.1                      | 229.0              | 99.5        |
| 29 | 337.2                      | 306.0              | 90.7        | 57.9                       | 59.5               | 102.8       | 28.8                       | 31.7               | 110.0       | 94.2                       | 77.0               | 81.7        | 104.3                      | 109.3              | 104.9       |
| 30 | 334.1                      | 367.3              | 109.9       | 78.1                       | 87.2               | 111.7       | 45.5                       | 55.4               | 121.8       | 103.9                      | 101.2              | 97.4        | 147.9                      | 170.4              | 115.2       |

Patient samples are numbered 1 to 30 (1-19 IEX tested samples, 20 to 30 UPLC tested samples).

<sup>a</sup> Derivatized Ile analysis excluded in samples containing *allo*-Ile (as identified by IEX).

**Table S7. Method correlation – patient plasma (Page 3 of 4).**

| #  | Met                        |                    |             | Orn                        |                    |             | Phe                        |                    |             | Pro                        |                    |             | Ser                        |                    |             |
|----|----------------------------|--------------------|-------------|----------------------------|--------------------|-------------|----------------------------|--------------------|-------------|----------------------------|--------------------|-------------|----------------------------|--------------------|-------------|
|    | IEX/<br>UPLC<br>( $\mu$ M) | LCMS<br>( $\mu$ M) | Rec.<br>(%) | IEX/<br>UPLC<br>( $\mu$ M) | LCMS<br>( $\mu$ M) | Rec.<br>(%) | IEX/<br>UPLC<br>( $\mu$ M) | LCMS<br>( $\mu$ M) | Rec.<br>(%) | IEX/<br>UPLC<br>( $\mu$ M) | LCMS<br>( $\mu$ M) | Rec.<br>(%) | IEX/<br>UPLC<br>( $\mu$ M) | LCMS<br>( $\mu$ M) | Rec.<br>(%) |
| 1  | 9.3                        | 9.1                | 98.1        | 48.3                       | 51.0               | 105.6       | 51.0                       | 51.4               | 100.8       | 112.6                      | 136.9              | 121.5       | 117.7                      | 123.6              | 105.0       |
| 2  | 21.4                       | 19.8               | 92.6        | 84.9                       | 83.5               | 98.4        | 67.4                       | 69.5               | 103.1       | 127.9                      | 144.9              | 113.3       | 179.0                      | 178.4              | 99.7        |
| 3  | 29.2                       | 30.1               | 103.1       | 108.4                      | 95.6               | 88.2        | 107.3                      | 104.0              | 96.9        | 306.2                      | 385.1              | 125.8       | 178.9                      | 185.0              | 103.5       |
| 4  | 30.5                       | 25.0               | 81.8        | 52.9                       | 61.9               | 117.0       | 49.2                       | 52.9               | 107.6       | 255.5                      | 277.6              | 108.7       | 179.8                      | 186.5              | 103.8       |
| 5  | 22.8                       | 20.5               | 90.0        | 104.3                      | 114.0              | 109.3       | 47.4                       | 52.3               | 110.3       | 248.7                      | 264.9              | 106.5       | 191.2                      | 198.6              | 103.9       |
| 6  | 19.8                       | 19.3               | 97.4        | 66.9                       | 74.5               | 111.4       | 220.5                      | 251.5              | 114.0       | 118.3                      | 144.8              | 122.4       | 164.7                      | 178.3              | 108.3       |
| 7  | 15.7                       | 14.6               | 93.0        | 90.6                       | 95.1               | 105.0       | 51.5                       | 52.7               | 102.5       | 76.7                       | 91.4               | 119.2       | 267.6                      | 269.8              | 100.8       |
| 8  | 26.7                       | 25.8               | 96.6        | 59.2                       | 57.6               | 97.3        | 70.7                       | 62.5               | 88.3        | 312.0                      | 300.7              | 96.4        | 178.6                      | 163.8              | 91.7        |
| 9  | 32.9                       | 28.5               | 86.7        | 60.6                       | 60.6               | 100.1       | 69.0                       | 63.8               | 92.5        | 89.3                       | 86.2               | 96.5        | 173.6                      | 148.2              | 85.4        |
| 10 | 19.2                       | 14.0               | 73.2        | 47.5                       | 43.9               | 92.4        | 73.0                       | 61.0               | 83.5        | 175.6                      | 170.5              | 97.1        | 172.4                      | 146.3              | 84.9        |
| 11 | 24.3                       | 19.6               | 80.5        | 97.2                       | 102.4              | 105.3       | 58.4                       | 53.3               | 91.2        | 164.6                      | 183.7              | 111.6       | 143.6                      | 134.3              | 93.5        |
| 12 | 31.6                       | 28.5               | 90.3        | 78.3                       | 80.9               | 103.4       | 38.1                       | 37.2               | 97.7        | 159.1                      | 167.9              | 105.5       | 194.1                      | 200.1              | 103.1       |
| 13 | 30.5                       | 28.8               | 94.4        | 109.7                      | 118.7              | 108.2       | 215.5                      | 204.8              | 95.0        | 141.1                      | 156.4              | 110.8       | 150.9                      | 154.2              | 102.2       |
| 14 | 13.9                       | 21.2               | 152.4       | 83.7                       | 89.7               | 107.2       | 67.1                       | 66.3               | 98.7        | 181.7                      | 178.3              | 98.1        | 129.1                      | 130.9              | 101.4       |
| 15 | 27.6                       | 25.7               | 93.2        | 95.8                       | 110.7              | 115.6       | 404.2                      | 406.8              | 100.7       | 246.1                      | 254.8              | 103.5       | 201.0                      | 181.8              | 90.5        |
| 16 | 24.3                       | 22.3               | 91.6        | 71.3                       | 65.2               | 91.4        | 60.7                       | 58.1               | 95.8        | 71.5                       | 73.1               | 102.2       | 117.7                      | 111.0              | 94.3        |
| 17 | 41.8                       | 37.1               | 88.7        | 82.3                       | 79.8               | 97.0        | 96.3                       | 94.3               | 97.9        | 289.3                      | 306.3              | 105.9       | 245.9                      | 242.1              | 98.5        |
| 18 | 18.7                       | 20.9               | 111.9       | 69.4                       | 67.6               | 97.4        | 47.6                       | 42.5               | 89.4        | 737.1                      | 761.0              | 103.2       | 181.0                      | 180.2              | 99.6        |
| 19 | 45.5                       | 44.7               | 98.1        | 67.2                       | 61.3               | 91.2        | 83.0                       | 88.2               | 106.3       | 153.7                      | 172.3              | 112.1       | 196.7                      | 200.2              | 101.8       |
| 20 | 32.2                       | 28.9               | 89.8        | 132.6                      | 97.7               | 73.6        | 129.4                      | 118.1              | 91.2        | 73.7                       | 82.8               | 112.4       | 142.0                      | 116.9              | 82.3        |
| 21 | 57.4                       | 56.7               | 98.8        | 106.1                      | 96.7               | 91.1        | 88.4                       | 76.1               | 86.1        | 63.9                       | 75.7               | 118.4       | 236.7                      | 197.2              | 83.3        |
| 22 | 28.1                       | 27.7               | 98.3        | 42.6                       | 33.7               | 79.0        | 138.4                      | 124.3              | 89.8        | 140.5                      | 136.5              | 97.1        | 158.4                      | 124.2              | 78.4        |
| 23 | 48.9                       | 46.9               | 96.0        | 206.0                      | 127.0              | 61.7        | 125.5                      | 106.8              | 85.1        | 172.7                      | 189.4              | 109.7       | 167.2                      | 133.3              | 79.7        |
| 24 | 32.0                       | 30.0               | 93.6        | 82.5                       | 77.9               | 94.5        | 141.9                      | 132.0              | 93.1        | 86.6                       | 106.2              | 122.7       | 159.7                      | 133.2              | 83.4        |
| 25 | 14.2                       | 14.0               | 98.4        | 124.3                      | 118.6              | 95.5        | 102.5                      | 92.1               | 89.9        | 118.4                      | 152.5              | 128.9       | 93.0                       | 69.7               | 75.0        |
| 26 | 8.0                        | 8.3                | 103.2       | 56.0                       | 41.9               | 74.7        | 73.4                       | 64.2               | 87.5        | 234.8                      | 256.9              | 109.4       | 83.6                       | 53.4               | 63.9        |
| 27 | 16.5                       | 18.3               | 111.0       | 158.2                      | 162.6              | 102.8       | 202.0                      | 196.7              | 97.4        | 252.6                      | 228.0              | 90.3        | 109.9                      | 83.5               | 76.0        |
| 28 | 72.8                       | 74.4               | 102.2       | 180.0                      | 190.4              | 105.8       | 126.7                      | 120.7              | 95.3        | 341.3                      | 342.9              | 100.5       | 218.6                      | 191.5              | 87.6        |
| 29 | 18.3                       | 19.8               | 107.8       | 65.9                       | 65.4               | 99.2        | 99.7                       | 77.4               | 77.7        | 229.6                      | 245.3              | 106.9       | 187.0                      | 158.5              | 84.8        |
| 30 | 27.5                       | 31.0               | 112.8       | 84.6                       | 105.2              | 124.4       | 113.8                      | 119.9              | 105.4       | 272.7                      | 261.8              | 96.0        | 135.1                      | 129.6              | 95.9        |

Patient samples are numbered 1 to 30 (1-19 IEX tested samples, 20 to 30 UPLC tested samples).

**Table S7. Method correlation – patient plasma (Page 4 of 4).**

| #  | Tau                        |                    |             | Thr                        |                    |             | Trp                        |                    |             | Tyr <sup>b</sup>           |                    |             | Val                        |                    |             |
|----|----------------------------|--------------------|-------------|----------------------------|--------------------|-------------|----------------------------|--------------------|-------------|----------------------------|--------------------|-------------|----------------------------|--------------------|-------------|
|    | IEX/<br>UPLC<br>( $\mu$ M) | LCMS<br>( $\mu$ M) | Rec.<br>(%) | IEX/<br>UPLC<br>( $\mu$ M) | LCMS<br>( $\mu$ M) | Rec.<br>(%) | IEX/<br>UPLC<br>( $\mu$ M) | LCMS<br>( $\mu$ M) | Rec.<br>(%) | IEX/<br>UPLC<br>( $\mu$ M) | LCMS<br>( $\mu$ M) | Rec.<br>(%) | IEX/<br>UPLC<br>( $\mu$ M) | LCMS<br>( $\mu$ M) | Rec.<br>(%) |
| 1  | 120.4                      | 135.7              | 112.7       | 57.0                       | 60.8               | 106.8       | 30.0                       | 27.1               | 90.3        | 42.0                       | 46.9               | 111.8       | 678.5                      | 670.3              | 98.8        |
| 2  | 137.7                      | 154.8              | 112.5       | 141.3                      | 141.3              | 100.0       | 41.9                       | 39.0               | 93.2        | 47.1                       | 48.2               | 102.4       | 279.8                      | 267.4              | 95.6        |
| 3  | 152.2                      | 169.0              | 111.0       | 165.9                      | 159.9              | 96.4        | 47.1                       | 49.2               | 104.5       | 73.3                       | 74.4               | 101.4       | 357.2                      | 344.9              | 96.6        |
| 4  | 51.8                       | 58.3               | 112.6       | 210.9                      | 216.6              | 102.7       | 49.6                       | 44.4               | 89.6        | 21.2                       | 23.0               | 108.7       | 267.0                      | 281.0              | 105.3       |
| 5  | 152.2                      | 176.6              | 116.0       | 183.7                      | 203.1              | 110.6       | 69.4                       | 62.9               | 90.6        | 119.8                      | 132.5              | 110.6       | 299.8                      | 314.3              | 104.8       |
| 6  | 88.7                       | 88.9               | 100.3       | 116.5                      | 124.7              | 107.0       | 88.4                       | 78.3               | 88.6        | 44.4                       | 50.5               | 113.7       | 191.3                      | 214.2              | 112.0       |
| 7  | 143.3                      | 160.8              | 112.2       | 75.9                       | 72.0               | 94.9        | 31.6                       | 40.6               | 128.4       | 48.6                       | 52.8               | 108.5       | 84.0                       | 79.6               | 94.7        |
| 8  | 52.3                       | 51.8               | 99.1        | 211.1                      | 194.2              | 92.0        | 30.3                       | 38.5               | 127.1       | 36.3                       | 39.9               | 110.0       | 209.0                      | 216.8              | 103.7       |
| 9  | 60.2                       | 65.9               | 109.5       | 122.7                      | 120.8              | 98.5        | 36.3                       | 50.8               | 140.0       | 72.5                       | 78.5               | 108.3       | 206.0                      | 208.3              | 101.1       |
| 10 | 54.8                       | 61.7               | 112.5       | 62.5                       | 62.1               | 99.3        | 39.5                       | 46.4               | 117.5       | 50.7                       | 56.3               | 111.2       | 193.2                      | 202.5              | 104.8       |
| 11 | 109.2                      | 120.9              | 110.8       | 137.8                      | 135.8              | 98.5        | 46.0                       | 60.5               | 131.6       | 110.1                      | 126.2              | 114.7       | 183.9                      | 183.1              | 99.6        |
| 12 | 110.8                      | 120.4              | 108.7       | 245.8                      | 243.4              | 99.0        | 48.4                       | 57.8               | 119.5       | 36.0                       | 38.8               | 107.7       | 243.0                      | 243.7              | 100.3       |
| 13 | 108.3                      | 109.6              | 101.2       | 130.6                      | 127.9              | 98.0        | 30.1                       | 39.5               | 131.1       | 286.3                      | 309.4              | 108.1       | 931.3                      | 960.4              | 103.1       |
| 14 | 59.6                       | 68.8               | 115.5       | 68.5                       | 72.8               | 106.3       | 48.4                       | 54.1               | 111.7       | 45.0                       | 50.5               | 112.1       | 114.8                      | 111.8              | 97.3        |
| 15 | 127.7                      | 141.0              | 110.4       | 154.3                      | 157.8              | 102.3       | 45.4                       | 56.2               | 123.8       | 103.7                      | 114.1              | 110.1       | 373.2                      | 365.1              | 97.8        |
| 16 | 54.7                       | 49.5               | 90.5        | 151.6                      | 133.0              | 87.7        | 49.3                       | 52.3               | 106.0       | 55.1                       | 54.3               | 98.5        | 207.7                      | 186.5              | 89.8        |
| 17 | 93.0                       | 90.3               | 97.1        | 374.1                      | 348.0              | 93.0        | 33.4                       | 40.6               | 121.7       | 137.2                      | 137.2              | 100.0       | 310.0                      | 299.5              | 96.6        |
| 18 | 142.2                      | 149.9              | 105.4       | 133.0                      | 134.4              | 101.1       | 42.6                       | 49.5               | 116.3       | 46.9                       | 54.6               | 116.5       | 161.0                      | 167.9              | 104.3       |
| 19 | 53.1                       | 56.3               | 106.0       | 176.5                      | 180.5              | 102.3       | 45.9                       | 55.8               | 121.6       | 102.9                      | 119.2              | 115.9       | 445.6                      | 462.1              | 103.7       |
| 20 | 26.5                       | 26.3               | 99.5        | 103.9                      | 92.2               | 88.7        | 82.8                       | 90.3               | 109.1       | -                          | -                  | -           | 283.4                      | 268.6              | 94.8        |
| 21 | 70.3                       | 64.9               | 92.4        | 231.0                      | 208.1              | 90.1        | 66.3                       | 65.8               | 99.3        | -                          | -                  | -           | 310.5                      | 281.3              | 90.6        |
| 22 | 24.2                       | 23.6               | 97.5        | 104.0                      | 94.7               | 91.0        | 58.2                       | 57.0               | 98.0        | -                          | -                  | -           | 273.7                      | 254.6              | 93.0        |
| 23 | 32.3                       | 33.1               | 102.6       | 225.3                      | 194.8              | 86.5        | 45.1                       | 46.0               | 101.8       | -                          | -                  | -           | 365.3                      | 352.2              | 96.4        |
| 24 | 35.9                       | 36.7               | 102.2       | 95.6                       | 82.3               | 86.1        | 73.6                       | 76.6               | 104.0       | -                          | -                  | -           | 484.6                      | 453.0              | 93.5        |
| 25 | 25.4                       | 25.3               | 99.5        | 84.0                       | 70.0               | 83.4        | 64.1                       | 67.2               | 104.9       | -                          | -                  | -           | 362.4                      | 337.9              | 93.3        |
| 26 | 41.8                       | 46.3               | 110.8       | 39.8                       | 36.4               | 91.3        | 34.1                       | 39.6               | 116.1       | 29.2                       | 37.2               | 127.4       | 296.1                      | 294.7              | 99.5        |
| 27 | 22.0                       | 21.9               | 99.5        | 60.7                       | 65.8               | 108.3       | 70.8                       | 78.1               | 110.4       | 38.2                       | 47.0               | 123.0       | 271.5                      | 307.0              | 113.1       |
| 28 | 43.3                       | 45.7               | 105.4       | 193.3                      | 199.1              | 103.0       | 43.4                       | 46.3               | 106.7       | 95.6                       | 109.3              | 114.4       | 254.2                      | 268.1              | 105.4       |
| 29 | 27.4                       | 27.6               | 100.8       | 110.3                      | 111.1              | 100.7       | 45.4                       | 51.9               | 114.3       | 58.4                       | 67.2               | 115.0       | 150.7                      | 145.8              | 96.8        |
| 30 | 24.8                       | 28.3               | 114.5       | 163.8                      | 175.3              | 107.0       | 45.4                       | 50.8               | 111.8       | 42.3                       | 59.9               | 141.6       | 264.7                      | 305.8              | 115.5       |

Patient samples are numbered 1 to 30 (1-19 IEX tested samples, 20 to 30 UPLC tested samples).

<sup>b</sup> Tyr was not reported for a subset of UPLC results due to limitations of the method.



**Table S8. Ion Suppression/ Matrix Effect Data Analysis <sup>a</sup>**

| S#  | Ala  | Arg  | Asp  | Cys  | Glu  | Gly  | His  | Ile  | Leu  | Lys  | Met  | Phe  | Pro  | Ser  | Thr  | Tyr  | Val  |
|-----|------|------|------|------|------|------|------|------|------|------|------|------|------|------|------|------|------|
| 1   | 29.2 | 27.2 | 27.5 | 38.9 | 24.3 | 24.4 | 26.4 | 24.7 | 24.7 | 24.6 | 25.0 | 23.1 | 38.9 | 21.8 | 23.2 | 29.0 | 24.1 |
| 2   | 23.5 | 25.9 | 26.3 | 33.8 | 23.7 | 24.5 | 30.0 | 20.9 | 22.4 | 25.2 | 26.4 | 26.6 | 33.8 | 21.1 | 21.9 | 26.4 | 24.8 |
| 3   | 30.6 | 28.2 | 28.2 | 39.0 | 26.4 | 30.1 | 27.3 | 25.4 | 24.1 | 28.0 | 31.5 | 27.9 | 39.0 | 27.4 | 23.7 | 28.5 | 30.1 |
| 4   | 53.5 | 49.4 | 53.2 | 56.1 | 52.2 | 49.8 | 55.0 | 55.0 | 53.7 | 54.5 | 52.3 | 54.0 | 56.3 | 48.3 | 41.2 | 53.7 | 51.2 |
| 5   | 43.0 | 38.3 | 43.1 | 39.6 | 40.8 | 37.5 | 44.6 | 44.0 | 42.0 | 43.2 | 40.7 | 46.1 | 49.4 | 36.9 | 28.6 | 41.2 | 41.1 |
| 6   | 34.7 | 25.9 | 35.1 | 35.5 | 32.4 | 30.3 | 32.3 | 36.1 | 32.3 | 34.9 | 30.4 | 34.4 | 40.2 | 23.0 | 17.6 | 33.1 | 35.6 |
| 7   | 26.1 | 21.1 | 29.8 | 23.3 | 78.1 | 26.8 | 25.4 | 28.3 | 24.2 | 27.7 | 30.3 | 28.8 | 35.4 | 27.0 | 20.1 | 24.3 | 33.2 |
| 8   | 7.8  | 17.4 | 12.1 | 16.8 | 5.4  | 12.8 | 16.1 | 10.3 | 7.9  | 13.8 | 19.5 | 15.5 | 18.8 | 19.4 | 11.3 | 15.7 | 9.1  |
| 9   | 27.8 | 27.9 | 27.1 | 31.2 | 29.3 | 27.4 | 29.0 | 28.3 | 25.7 | 29.7 | 31.1 | 29.0 | 39.3 | 25.4 | 27.6 | 29.3 | 29.2 |
| 10  | 33.0 | 33.7 | 35.3 | 36.2 | 35.9 | 36.6 | 36.4 | 34.6 | 35.9 | 35.5 | 38.3 | 38.3 | 40.5 | 40.5 | 33.3 | 35.3 | 32.2 |
| 11  | 23.2 | 24.5 | 24.0 | 26.4 | 26.1 | 29.1 | 25.2 | 25.3 | 22.6 | 28.0 | 27.8 | 26.3 | 33.7 | 29.0 | 20.0 | 26.8 | 26.0 |
| 12  | 27.6 | 25.2 | 27.7 | 30.1 | 26.0 | 28.7 | 27.9 | 26.7 | 24.1 | 28.3 | 29.5 | 32.6 | 34.6 | 28.6 | 25.8 | 27.5 | 25.3 |
| 13  | 30.7 | 29.3 | 28.6 | 30.6 | 22.3 | 27.1 | 31.7 | 26.2 | 29.6 | 30.2 | 28.5 | 31.8 | 38.2 | 37.8 | 29.3 | 27.8 | 21.4 |
| 14  | 16.1 | 18.2 | 18.3 | 21.1 | 17.6 | 17.8 | 16.3 | 14.8 | 11.2 | 18.4 | 20.7 | 17.7 | 26.1 | 20.0 | 16.4 | 19.7 | 17.1 |
| 15  | 27.6 | 23.3 | 26.3 | 25.7 | 21.5 | 23.6 | 26.2 | 23.0 | 20.7 | 26.3 | 26.4 | 29.3 | 31.5 | 32.0 | 25.4 | 29.3 | 24.1 |
| 16  | 25.6 | 20.0 | 24.8 | 27.0 | 24.0 | 26.7 | 26.6 | 17.5 | 20.8 | 26.8 | 28.3 | 26.9 | 33.8 | 37.6 | 23.6 | 29.2 | 21.3 |
| 17  | 16.6 | 18.4 | 24.6 | 23.2 | 20.0 | 23.6 | 19.3 | 24.6 | 22.7 | 29.6 | 22.0 | 25.8 | 34.0 | 26.5 | 24.6 | 22.3 | 23.1 |
| 18  | 6.5  | 6.1  | 9.4  | 13.2 | 8.4  | 4.1  | 8.4  | 13.7 | 13.0 | 13.9 | 11.5 | 45.9 | 15.5 | 13.2 | 9.5  | 9.0  | 10.1 |
| 19  | 23.2 | 22.9 | 26.9 | 24.6 | 20.9 | 26.3 | 24.5 | 23.0 | 24.0 | 31.3 | 28.7 | 25.8 | 40.4 | 45.4 | 22.7 | 25.7 | 27.3 |
| 20  | 45.5 | 41.2 | 40.4 | 44.3 | 43.2 | 44.8 | 42.4 | 47.6 | 42.3 | 47.3 | 46.7 | 45.9 | 51.9 | 62.5 | 40.6 | 46.1 | 42.7 |
| 21  | 21.4 | 21.6 | 20.1 | 19.9 | 18.7 | 21.4 | 21.7 | 20.2 | 21.9 | 26.6 | 24.3 | 22.2 | 32.5 | 54.0 | 21.0 | 22.6 | 18.3 |
| 22  | 25.4 | 31.3 | 29.2 | 31.5 | 28.7 | 35.2 | 33.1 | 32.1 | 30.9 | 31.2 | 30.0 | 31.4 | 34.8 | 28.2 | 30.2 | 30.2 | 28.8 |
| 23  | 22.0 | 24.6 | 23.1 | 21.1 | 19.3 | 23.2 | 20.2 | 24.9 | 21.7 | 27.4 | 23.3 | 26.1 | 34.4 | 54.0 | 17.8 | 25.0 | 24.1 |
| 24  | 24.9 | 26.7 | 26.9 | 27.2 | 23.6 | 22.4 | 25.0 | 23.9 | 26.8 | 31.9 | 30.1 | 27.7 | 41.3 | 54.5 | 23.7 | 25.8 | 26.3 |
| 25  | 19.3 | 18.7 | 21.4 | 19.2 | 17.5 | 21.2 | 19.1 | 21.2 | 18.0 | 23.6 | 21.5 | 23.7 | 35.4 | 51.4 | 15.0 | 24.3 | 20.6 |
| 26  | 21.7 | 15.2 | 27.9 | 21.3 | 18.8 | 22.8 | 17.9 | 14.0 | 19.5 | 21.3 | 24.9 | 22.7 | 32.7 | 22.3 | 20.0 | 21.9 | 19.6 |
| 27  | 29.8 | 22.7 | 30.3 | 28.2 | 30.8 | 22.7 | 27.8 | 30.2 | 26.9 | 31.9 | 25.0 | 30.1 | 33.9 | 20.6 | 26.8 | 27.5 | 23.1 |
| 28  | 25.7 | 23.3 | 25.8 | 25.9 | 24.9 | 17.4 | 25.1 | 27.1 | 25.7 | 26.6 | 23.7 | 25.8 | 33.9 | 20.0 | 22.2 | 24.9 | 20.7 |
| 29  | 23.7 | 31.8 | 24.5 | 25.8 | 31.4 | 21.3 | 28.1 | 30.8 | 30.8 | 33.6 | 32.7 | 28.3 | 32.5 | 30.3 | 26.8 | 28.9 | 29.4 |
| 30  | 29.2 | 29.8 | 25.0 | 29.3 | 26.2 | 21.6 | 22.7 | 24.7 | 30.6 | 30.8 | 30.2 | 31.2 | 34.5 | 31.5 | 24.8 | 28.4 | 27.3 |
| Min | 6.5  | 6.1  | 9.4  | 13.2 | 5.4  | 4.1  | 8.4  | 10.3 | 7.9  | 13.8 | 11.5 | 15.5 | 15.5 | 13.2 | 9.5  | 9.0  | 9.1  |
| Max | 53.5 | 49.4 | 53.2 | 56.1 | 78.1 | 49.8 | 55.0 | 55.0 | 53.7 | 54.5 | 52.3 | 54.0 | 56.3 | 62.5 | 41.2 | 53.7 | 51.2 |
| Avg | 26.5 | 25.7 | 27.4 | 28.9 | 27.3 | 26.0 | 27.1 | 26.6 | 25.9 | 29.4 | 28.7 | 30.0 | 35.9 | 33.0 | 23.8 | 28.0 | 26.2 |

<sup>a</sup> Displayed value = (IS Area of STD - IS Area of Plasma Sample)/(IS Area of STD in 0.1 M HCl). The values account for all matrix effects in sample preparation plus ion suppression for the C13,15 labeled internal standard compounds (Cambridge Isotope MSK-A2).

**Table S9. Spiked plasma analysis**

| AA <sup>b</sup> | Level 1 <sup>c</sup> |           |          | Level 2   |           |          | Level 3   |           |          | Level 4   |           |          | Level 5   |           |          | Level 6   |           |          |
|-----------------|----------------------|-----------|----------|-----------|-----------|----------|-----------|-----------|----------|-----------|-----------|----------|-----------|-----------|----------|-----------|-----------|----------|
|                 | Exp. (µM)            | Lcms (µM) | Rec. (%) | Exp. (µM) | Lcms (µM) | Rec. (%) | Exp. (µM) | Lcms (µM) | Rec. (%) | Exp. (µM) | Lcms (µM) | Rec. (%) | Exp. (µM) | Lcms (µM) | Rec. (%) | Exp. (µM) | Lcms (µM) | Rec. (%) |
| Ala             | 265.0                | 272.6     | 102.9    | 290.0     | 288.4     | 99.5     | 322.0     | 322.2     | 100.1    | 359.5     | 378.9     | 105.4    | 515.0     | 507.3     | 98.5     | 697.0     | 709.0     | 101.7    |
| Arg             | 127.5                | 132.5     | 103.9    | 132.5     | 137.7     | 103.9    | 172.5     | 184.0     | 106.7    | 481.2     | 459.7     | 95.5     | 1312.5    | 1255.6    | 95.7     | N/A       | N/A       | N/A      |
| ASA             | 25.0                 | 28.4      | 113.5    | 50.0      | 54.0      | 107.9    | 166.7     | 165.4     | 99.2     | 200.0     | 210.1     | 105.1    | 322.6     | 355.7     | 110.3    | 500.0     | 568.8     | 113.8    |
| Asn             | 44.1                 | 47.9      | 108.5    | 63.5      | 69.8      | 109.9    | 81.6      | 76.6      | 93.8     | 88.5      | 69.7      | 78.7     | 313.5     | 231.1     | 73.7     | 419.1     | 385.7     | 92.0     |
| Asp             | 11.2                 | 15.3      | 136.6    | 14.1      | 15.7      | 111.1    | 39.1      | 37.2      | 95.0     | 48.7      | 49.9      | 102.4    | 264.1     | 268.3     | 101.6    | 386.2     | 404.1     | 104.6    |
| Cit             | 13.2                 | 12.7      | 96.5     | 14.4      | 13.9      | 96.5     | 39.4      | 33.0      | 83.8     | 50.7      | 45.5      | 89.8     | 264.4     | 225.6     | 85.3     | 388.2     | 336.7     | 86.7     |
| Cys             | 17.8                 | 21.5      | 120.8    | 27.3      | 27.5      | 100.8    | 36.5      | 32.8      | 89.9     | 39.8      | 41.3      | 103.7    | 152.3     | 148.3     | 97.4     | 205.3     | 209.0     | 101.8    |
| Glu             | 36.1                 | 37.7      | 104.5    | 57.9      | 64.5      | 111.4    | 61.1      | 59.8      | 98.0     | 95.4      | 91.9      | 96.3     | 286.1     | 266.6     | 93.2     | 432.9     | 438.7     | 101.3    |
| Gly             | 219.0                | 218.2     | 99.6     | 256.5     | 241.6     | 94.2     | 261.9     | 263.9     | 100.8    | 286.9     | 289.7     | 101.0    | 511.9     | 490.9     | 95.9     | 594.0     | 560.4     | 94.4     |
| Gln             | 561.0                | 559.7     | 99.8     | 669.5     | 675.3     | 100.9    | 723.4     | 679.4     | 93.9     | 748.6     | 658.3     | 87.9     | 875.9     | 799.2     | 91.2     | 1231.3    | 1098.8    | 89.2     |
| HCY             | 5.0                  | 5.0       | 99.4     | 10.0      | 8.1       | 81.0     | 50.0      | 46.5      | 93.0     | 375.0     | 374.0     | 99.7     | 1250.0    | 1230.5    | 98.4     | N/A       | N/A       | N/A      |
| His             | 105.3                | 107.2     | 101.8    | 110.3     | 126.0     | 114.2    | 150.3     | 165.2     | 109.9    | 462.0     | 484.8     | 104.9    | 1301.2    | 1310.2    | 100.7    | N/A       | N/A       | N/A      |
| HCT             | 11.4                 | 11.4      | 99.5     | 28.6      | 27.8      | 97.4     | 57.1      | 53.4      | 93.4     | 142.9     | 159.4     | 111.6    | 428.6     | 434.8     | 101.5    | 857.1     | 876.8     | 102.3    |
| Ile             | 42.7                 | 46.3      | 108.6    | 80.2      | 84.0      | 104.8    | 156.4     | 157.5     | 100.7    | 181.4     | 187.1     | 103.2    | 406.4     | 420.5     | 103.5    | 417.7     | 440.6     | 105.5    |
| Leu             | 75.6                 | 77.1      | 102.0    | 113.1     | 107.9     | 95.4     | 232.5     | 239.1     | 102.8    | 270.0     | 282.7     | 104.7    | 450.6     | 421.6     | 93.6     | 607.5     | 507.6     | 83.6     |
| Lys             | 214.6                | 212.3     | 98.9     | 219.6     | 226.3     | 103.1    | 259.6     | 255.1     | 98.3     | 556.8     | 550.2     | 98.8     | 1356.9    | 1327.2    | 97.8     | N/A       | N/A       | N/A      |
| Met             | 17.8                 | 17.7      | 99.7     | 40.2      | 40.3      | 100.2    | 55.3      | 52.5      | 95.0     | 65.2      | 62.0      | 95.2     | 290.2     | 252.4     | 87.0     | 392.8     | 356.5     | 90.8     |
| Orn             | 157.3                | 172.5     | 109.6    | 162.3     | 165.5     | 102.0    | 202.3     | 207.8     | 102.7    | 507.1     | 514.1     | 101.4    | 1327.7    | 1323.8    | 99.7     | N/A       | N/A       | N/A      |
| Pro             | 208.5                | 229.5     | 110.1    | 235.6     | 249.7     | 106.0    | 246.0     | 255.7     | 103.9    | 260.6     | 269.1     | 103.3    | 485.6     | 470.0     | 96.8     | 583.5     | 602.3     | 103.2    |
| Phe             | 36.2                 | 36.0      | 99.5     | 73.7      | 66.9      | 90.8     | 79.4      | 81.1      | 102.2    | 104.4     | 97.4      | 93.3     | 329.4     | 311.7     | 94.6     | 411.2     | 362.5     | 88.2     |
| Ser             | 153.0                | 170.5     | 111.4    | 180.2     | 197.2     | 109.4    | 190.5     | 202.9     | 106.5    | 205.2     | 210.6     | 102.7    | 430.2     | 427.7     | 99.4     | 528.0     | 556.8     | 105.5    |
| Tau             | 50.7                 | 47.1      | 92.9     | 75.7      | 67.9      | 89.8     | 127.4     | 129.5     | 101.6    | 164.9     | 156.2     | 94.7     | 300.7     | 264.2     | 87.9     | 502.4     | 507.8     | 101.1    |
| Thr             | 114.3                | 118.1     | 103.3    | 151.8     | 148.3     | 97.7     | 162.5     | 157.0     | 96.6     | 187.5     | 184.7     | 98.5     | 412.5     | 390.1     | 94.6     | 489.3     | 459.2     | 93.9     |
| Trp             | 58.7                 | 56.8      | 96.9     | 63.7      | 60.8      | 95.5     | 103.7     | 96.3      | 92.9     | 421.6     | 359.5     | 85.3     | 1277.4    | 1074.8    | 84.1     | N/A       | N/A       | N/A      |
| Tyr             | 46.4                 | 45.0      | 96.9     | 83.9      | 72.5      | 86.4     | 107.3     | 101.2     | 94.3     | 132.3     | 128.5     | 97.1     | 357.3     | 343.9     | 96.3     | 421.4     | 404.9     | 96.1     |
| Val             | 142.7                | 143.9     | 100.9    | 180.2     | 183.1     | 101.6    | 415.9     | 427.7     | 102.8    | 440.9     | 420.7     | 95.4     | 517.7     | 527.5     | 101.9    | 665.9     | 661.2     | 99.3     |

For Ala, Asn, Asp, Cit, Cys, Glu, Gly, Ile, Leu, Met, Phe, Pro, Ser, Tau, Thr, Tyr, and Val, %plasma (v/v) equaled either 90% or 85% across all levels. For Arg, His, homocystine (HCY), Lys, Orn, and Trp, %plasma = 96%, 96%, 96%, 85%, and 50% for levels 1 to 5, respectively. For argininosuccinic acid (ASA) and Gln %plasma ranged from 86 to 98%. Homocitrulline spiked plasmas were >91% plasma. For all amino acids except Gln, expected concentration (Exp.) was determined by extrapolation based on LCMS measurement of the unspiked plasma. For Gln expected concentration equaled ion-exchange chromatography measurement for that sample (LCMS measurement of unspiked plasma was not performed). Additional high levels were tested for ASA – 1142.9 µM (Rec. = 101.3%) and 1428.57 µM (rec. = 107.4%), as well as for Gln – 1701.0 µM (Rec. =92.8%) and 1771.5 µM (Rec. = 99.2%).

**Table S10. Spiked urine analysis**

| AA  | Level 1   |           |          | Level 2   |           |          | Level 3   |           |          | Level 4   |           |          | Level 5   |           |          | Level 6   |           |          | Level 7   |           |          |
|-----|-----------|-----------|----------|-----------|-----------|----------|-----------|-----------|----------|-----------|-----------|----------|-----------|-----------|----------|-----------|-----------|----------|-----------|-----------|----------|
|     | Exp. (µM) | Lcms (µM) | Rec. (%) | Exp. (µM) | Lcms (µM) | Rec. (%) | Exp. (µM) | Lcms (µM) | Rec. (%) | Exp. (µM) | Lcms (µM) | Rec. (%) | Exp. (µM) | Lcms (µM) | Rec. (%) | Exp. (µM) | Lcms (µM) | Rec. (%) | Exp. (µM) | Lcms (µM) | Rec. (%) |
| Arg | 23        | 22.1      | 96.2     | 34.5      | 30.2      | 87.6     | 95.1      | 91.6      | 96.4     | 265       | 282.4     | 106.5    | 291.4     | 295.3     | 101.3    | 513.4     | 487.3     | 94.9     | 1258.4    | 1245.5    | 99       |
| Lys | 51.5      | 50.7      | 98.5     | 77.3      | 76.1      | 98.5     | 151       | 141.1     | 93.5     | 287.2     | 268.2     | 93.4     | 342.7     | 341.5     | 99.6     | 533.1     | 524.1     | 98.3     | 1270.7    | 1167.1    | 91.9     |
| Orn | 3.7       | 4         | 108.8    | 5.5       | 4.6       | 83.4     | 57.2      | 56.1      | 98.1     | 255.2     | 265.2     | 103.9    | 256.6     | 259.5     | 101.1    | 504.6     | 554.7     | 109.9    | 1252.9    | 1453.7    | 116      |

Expected concentrations were extrapolated from LCMS result for unspiked/undiluted specimen. Spiked urine specimens (Levels 1-7) consisted of 50, 75, 98, 90, 90, 80, and 50% urine.

**Table S11. Spiked CSF analysis**

| AA  | Level 1   |           |          | Level 2   |           |          | Level 3   |           |          | Level 4   |           |          | Level 5   |           |          | Level 6   |           |          |
|-----|-----------|-----------|----------|-----------|-----------|----------|-----------|-----------|----------|-----------|-----------|----------|-----------|-----------|----------|-----------|-----------|----------|
|     | Exp. (µM) | Lcms (µM) | Rec. (%) | Exp. (µM) | Lcms (µM) | Rec. (%) | Exp. (µM) | Lcms (µM) | Rec. (%) | Exp. (µM) | Lcms (µM) | Rec. (%) | Exp. (µM) | Lcms (µM) | Rec. (%) | Exp. (µM) | Lcms (µM) | Rec. (%) |
| Gly | 4.1       | 4.4       | 107.2    | 6.2       | 6.4       | 104.2    | 11.7      | 12.4      | 105.8    | 58.1      | 58.1      | 100.1    | 257.4     | 262       | 101.8    | 264       | 250.3     | 94.8     |
| Ser | 17.5      | 17.5      | 99.9     | 26.3      | 26.3      | 100.1    | 28.2      | 34.4      | 121.8    | 84.4      | 84.6      | 100.3    | 281.6     | 283.8     | 100.8    | 279.8     | 258.2     | 92.3     |

Expected concentrations were extrapolated from LCMS result for unspiked/undiluted specimen. Spiked CSF specimens (Levels 1-6) consisted of 50, 75, 75, 98, 90, 90, and 90% CSF

**Table S12. Unlabeled Isoleucine and *allo*-Ile in plasma analysis.**

| Sample | Target Concentrations   |                          | Result Concentrations   |                          | Recovery (%)  |               |
|--------|-------------------------|--------------------------|-------------------------|--------------------------|---------------|---------------|
|        | [Ile] <sub>Target</sub> | [allo] <sub>Target</sub> | [Ile] <sub>Result</sub> | [allo] <sub>Result</sub> | Ile           | allo          |
| 1      | 1044                    | 1000                     | 978.4                   | 985.88                   | <b>93.9</b>   | <b>98.59</b>  |
| 2      | 44                      | 66.7                     | 45.27                   | 71.25                    | <b>107.41</b> | <b>106.82</b> |
| 3      | 403.02                  | 400.84                   | 407.29                  | 395.17                   | <b>101.06</b> | <b>98.59</b>  |
| 4      | 927.25                  | 300.63                   | 814.77                  | 293.1                    | <b>87.87</b>  | <b>97.49</b>  |
| 5      | 1451                    | 200.4                    | 1341.41                 | 199.83                   | <b>92.45</b>  | <b>99.71</b>  |
| 6      | 82.85                   | 7.35                     | 84.73                   | 8.82                     | <b>102.27</b> | <b>119.99</b> |
| 7      | 129.07                  | 16.22                    | 124.2                   | 14.07                    | <b>96.22</b>  | <b>86.74</b>  |
| 8      | 88.1                    | 7.14                     | 89.9                    | 7.5                      | <b>102.05</b> | <b>104.98</b> |
| 9      | 130.73                  | 9.2                      | 120.53                  | 9.03                     | <b>92.19</b>  | <b>98.11</b>  |

Samples 3 and 6-9 (100% plasma) results based on IEX analysis of patient plasma (Maple Syrup Urine Disease patient plasmas). Additional samples 1, 2, 4, and 5 concentrations extrapolated based on sample spiking with standard or water (50, 99, 75, 50% plasma, respectively).

**Table S13. Matrix-specific precision and signal suppression results (Page 1 of 5).**

**TESTING IN PLASMA**

**ALANINE IN PLASMA (IEX REFERENCE VALUE = 421.4 uM)**

| Run | Replicate A | Replicate B | Replicate C | Avg   | STDdev | %CV (Intrarun) |
|-----|-------------|-------------|-------------|-------|--------|----------------|
| 1   | 450.7       | 464.9       | 459.7       | 458.4 | 7.2    | 1.6            |
| 2   | 454.9       | 460.8       | 457.3       | 457.7 | 2.9    | 0.6            |
| 3   | 439.0       | 414.2       | 425.0       | 426.1 | 12.4   | 2.9            |
| 4   | 434.4       | 419.8       | 454.4       | 436.2 | 17.4   | 4.0            |
| 5   | 434.38      | 419.76      | 454.42      | 436.2 | 17.4   | 4.0            |

|                   |       |        |     |
|-------------------|-------|--------|-----|
| n = 15 replicates | Avg   | STDdev | %CV |
|                   | 442.9 | 17.2   | 3.9 |

**I.S. ALANINE C13, N15 (MSK-A2)**

| STD            | REPLICATE A    | REPLICATE B    | REPLICATE C    | SUPPR. | SUPPR. | SUPPR. | SUPPR. |
|----------------|----------------|----------------|----------------|--------|--------|--------|--------|
| I.S. INTENSITY | I.S. INTENSITY | I.S. INTENSITY | I.S. INTENSITY | A      | B      | C      | Avg    |
| 4239283        | 3033192.7      | 3103082.6      | 2911927.9      | 28.5   | 26.8   | 31.3   | 28.9   |
| 896780.7       | 1921769.9      | 2132271.3      | 2070579.1      | -114.3 | -137.8 | -130.9 | -127.7 |
| 4670792        | 2591238.1      | 3183753.4      | 3569416.7      | 44.5   | 31.8   | 23.6   | 33.3   |
| 4981035.2      | 2695016.6      | 2759158        | 3045964.7      | 45.9   | 44.6   | 38.8   | 43.1   |
| 5659569.4      | 3290917.6      | 2781605.4      | 3726108.2      | 41.9   | 50.9   | 34.2   | 42.3   |

**ARGININE IN PLASMA (IEX REFERENCE VALUE = 124.3 uM)**

| Run | Replicate A | Replicate B | Replicate C | Avg   | STDdev | %CV (Intrarun) |
|-----|-------------|-------------|-------------|-------|--------|----------------|
| 1   | 116.18      | 130.03      | 126.33      | 124.2 | 7.2    | 5.8            |
| 2   | 129.51      | 126.54      | 129.79      | 128.6 | 1.8    | 1.4            |
| 3   | 129.2       | 129.59      | 127.46      | 128.8 | 1.1    | 0.9            |
| 4   | 126.77      | 120.95      | 130.8       | 126.2 | 5.0    | 3.9            |
| 5   | 126.96      | 124.69      | 133.38      | 128.3 | 4.5    | 3.5            |

|                   |       |        |     |
|-------------------|-------|--------|-----|
| n = 15 replicates | Avg   | STDdev | %CV |
|                   | 127.2 | 4.2    | 3.3 |

**I.S. ARGININE C13, N15 (MSK-A2)**

| STD            | REPLICATE A    | REPLICATE B    | REPLICATE C    | SUPPR. | SUPPR. | SUPPR. | SUPPR. |
|----------------|----------------|----------------|----------------|--------|--------|--------|--------|
| I.S. INTENSITY | I.S. INTENSITY | I.S. INTENSITY | I.S. INTENSITY | A      | B      | C      | Avg    |
| 2548978.6      | 2134102        | 2216475.8      | 2027676.3      | 16.3   | 13.0   | 20.5   | 16.6   |
| 664968.5       | 1560783.8      | 1712207.4      | 1561123.3      | -134.7 | -157.5 | -134.8 | -142.3 |
| 1834163.4      | 1174189.2      | 1484358.7      | 1786092.7      | 36.0   | 19.1   | 2.6    | 19.2   |
| 2476249.2      | 1465223.9      | 1653480.4      | 1711569.3      | 40.8   | 33.2   | 30.9   | 35.0   |
| 2344328.8      | 1685389.3      | 1524421.1      | 2329400.3      | 28.1   | 35.0   | 0.6    | 21.2   |

**ASPARAGINE IN PLASMA (IEX REFERENCE VALUE = 45.4 uM)**

| Run | Replicate A | Replicate B | Replicate C | Avg  | STDdev | %CV (Intrarun) |
|-----|-------------|-------------|-------------|------|--------|----------------|
| 1   | 42.2        | 35.7        | 44.6        | 40.9 | 4.6    | 11.2           |
| 2   | 46.6        | 48.2        | 49.0        | 47.9 | 1.2    | 2.6            |
| 3   | 49.8        | 42.5        | 39.0        | 43.8 | 5.5    | 12.5           |
| 4   | 43.2        | 48.4        | 47.4        | 46.3 | 2.8    | 6.0            |
| 5   | 45.8        | 43.8        | 50.0        | 46.5 | 3.2    | 6.9            |

|                   |      |        |     |
|-------------------|------|--------|-----|
| n = 15 replicates | Avg  | STDdev | %CV |
|                   | 45.1 | 4.1    | 9.1 |

**I.S. ASPARAGINE C13, N15 (MSK-A2)**

| STD            | REPLICATE A    | REPLICATE B    | REPLICATE C    | SUPPR. | SUPPR. | SUPPR. | SUPPR. |
|----------------|----------------|----------------|----------------|--------|--------|--------|--------|
| I.S. INTENSITY | I.S. INTENSITY | I.S. INTENSITY | I.S. INTENSITY | A      | B      | C      | Avg    |
| 2336347        | 1907309.4      | 1919787.8      | 1828197.4      | 18.4   | 17.8   | 21.7   | 19.3   |
| 553561         | 1227945.6      | 1353338.4      | 1278198.9      | -121.8 | -144.5 | -130.9 | -132.4 |
| 18835.2        | 13289.6        | 11563.3        | 13805.4        | 29.4   | 38.6   | 26.7   | 31.6   |
| 2631483        | 1632038.7      | 1755407.3      | 1794657.1      | 38.0   | 33.3   | 31.8   | 34.4   |
| 2618287.5      | 1797291.8      | 1566619        | 2301878.4      | 31.4   | 40.2   | 12.1   | 27.9   |

**ASPARTIC ACID IN PLASMA (IEX REFERENCE VALUE = 25.0 uM)**

| Run | Replicate A | Replicate B | Replicate C | Avg  | STDdev | %CV (Intrarun) |
|-----|-------------|-------------|-------------|------|--------|----------------|
| 1   | 23.0        | 22.8        | 24.4        | 23.4 | 0.8    | 3.6            |
| 2   | 25.4        | 24.5        | 25.7        | 25.2 | 0.6    | 2.4            |
| 3   | 18.0        | 26.2        | 24.7        | 23.0 | 4.3    | 18.9           |
| 4   | 25.5        | 27.2        | 29.1        | 27.3 | 1.8    | 6.5            |
| 5   | 24.1        | 24.8        | 23.4        | 24.1 | 0.7    | 2.8            |

|                   |      |        |     |
|-------------------|------|--------|-----|
| n = 15 replicates | Avg  | STDdev | %CV |
|                   | 24.6 | 2.4    | 9.9 |

**I.S. ASPARTIC ACID C13, N15 (MSK-A2)**

| STD            | REPLICATE A    | REPLICATE B    | REPLICATE C    | SUPPR. | SUPPR. | SUPPR. | SUPPR. |
|----------------|----------------|----------------|----------------|--------|--------|--------|--------|
| I.S. INTENSITY | I.S. INTENSITY | I.S. INTENSITY | I.S. INTENSITY | A      | B      | C      | Avg    |
| 2336347        | 1907309.4      | 1919787.8      | 1828197.4      | 18.4   | 17.8   | 21.7   | 19.3   |
| 553561         | 1227945.6      | 1353338.4      | 1278198.9      | -121.8 | -144.5 | -130.9 | -132.4 |
| 18835.2        | 13289.6        | 11563.3        | 13805.4        | 29.4   | 38.6   | 26.7   | 31.6   |
| 2631483        | 1632038.7      | 1755407.3      | 1794657.1      | 38.0   | 33.3   | 31.8   | 34.4   |
| 2618287.5      | 1797291.8      | 1566619        | 2301878.4      | 31.4   | 40.2   | 12.1   | 27.9   |

**CITRULLINE IN PLASMA (IEX REFERENCE VALUE = 25.3 uM)**

| Run | Replicate A | Replicate B | Replicate C | Avg  | STDdev | %CV (Intrarun) |
|-----|-------------|-------------|-------------|------|--------|----------------|
| 1   | 27.8        | 26.12       | 24.94       | 26.3 | 1.4    | 5.5            |
| 2   | 25.17       | 24.6        | 24.65       | 24.8 | 0.3    | 1.3            |
| 3   | 25.19       | 31.18       | 28.65       | 28.3 | 3.0    | 10.6           |
| 4   | 26.46       | 26.84       | 27.29       | 26.9 | 0.4    | 1.5            |
| 5   | 24.97       | 24.2        | 21.53       | 23.6 | 1.8    | 7.7            |

|                   |      |        |     |
|-------------------|------|--------|-----|
| n = 15 replicates | Avg  | STDdev | %CV |
|                   | 26.0 | 2.2    | 8.6 |

**I.S. CITRULLINE C13, N15 (MSK-A2)**

| STD            | REPLICATE A    | REPLICATE B    | REPLICATE C    | SUPPR. | SUPPR. | SUPPR. | SUPPR. |
|----------------|----------------|----------------|----------------|--------|--------|--------|--------|
| I.S. INTENSITY | I.S. INTENSITY | I.S. INTENSITY | I.S. INTENSITY | A      | B      | C      | Avg    |
| 177806.7       | 142065.4       | 144687.2       | 141269.2       | 20.1   | 18.6   | 20.5   | 19.8   |
| 54813.9        | 119102.4       | 127517.6       | 122592.4       | -117.3 | -132.6 | -123.7 | -124.5 |
| 157705.7       | 88244.1        | 111932.7       | 126222.5       | 44.0   | 29.0   | 20.0   | 31.0   |
| 221130.7       | 129885.4       | 139678.9       | 152663.6       | 41.3   | 36.8   | 31.0   | 36.4   |
| 223961.5       | 143502.4       | 133119.3       | 187612         | 35.9   | 40.6   | 16.2   | 30.9   |

**CYSTEINE IN PLASMA (IEX REFERENCE VALUE = 8.9 uM)**

| Run | Replicate A | Replicate B | Replicate C | Avg  | STDdev | %CV (Intrarun) |
|-----|-------------|-------------|-------------|------|--------|----------------|
| 1   | 11.2        | 10.9        | 10.2        | 10.8 | 0.5    | 5.1            |
| 2   | 12.1        | 11.8        | 14.4        | 12.8 | 1.4    | 11.1           |
| 3   | 12.1        | 11.5        | 13.8        | 12.5 | 1.2    | 9.3            |
| 4   | 12.4        | 13.8        | 13.6        | 13.2 | 0.8    | 5.9            |
| 5   | 9.9         | 11.7        | 10.8        | 10.8 | 0.9    | 8.3            |

|                   |      |        |      |
|-------------------|------|--------|------|
| n = 15 replicates | Avg  | STDdev | %CV  |
|                   | 12.0 | 1.4    | 11.3 |

**I.S. CYSTEINE C13, N15 (MSK-A2)**

| STD            | REPLICATE A    | REPLICATE B    | REPLICATE C    | SUPPR. | SUPPR. | SUPPR. | SUPPR. |
|----------------|----------------|----------------|----------------|--------|--------|--------|--------|
| I.S. INTENSITY | I.S. INTENSITY | I.S. INTENSITY | I.S. INTENSITY | A      | B      | C      | Avg    |
| 177806.7       | 142065.4       | 144687.2       | 141269.2       | 20.1   | 18.6   | 20.5   | 19.8   |
| 54813.9        | 119102.4       | 127517.6       | 122592.4       | -117.3 | -132.6 | -123.7 | -124.5 |
| 157705.7       | 88244.1        | 111932.7       | 126222.5       | 44.0   | 29.0   | 20.0   | 31.0   |
| 221130.7       | 129885.4       | 139678.9       | 152663.6       | 41.3   | 36.8   | 31.0   | 36.4   |
| 223961.5       | 143502.4       | 133119.3       | 187612         | 35.9   | 40.6   | 16.2   | 30.9   |

**GLUTAMIC ACID IN PLASMA (IEX REFERENCE VALUE = 76.2 uM)**

| Run | Replicate A | Replicate B | Replicate C | Avg  | STDdev | %CV (Intrarun) |
|-----|-------------|-------------|-------------|------|--------|----------------|
| 1   | 74.6        | 72.2        | 71.9        | 72.9 | 1.5    | 2.0            |
| 2   | 78.9        | 79.1        | 79.9        | 79.3 | 0.5    | 0.6            |
| 3   | 74.2        | 72.9        | 74.3        | 73.8 | 0.8    | 1.1            |
| 4   | 85.4        | 91.7        | 94.2        | 90.4 | 4.5    | 5.0            |
| 5   | 80.6        | 85.9        | 81.8        | 82.8 | 2.7    | 3.3            |

|                   |      |        |     |
|-------------------|------|--------|-----|
| n = 15 replicates | Avg  | STDdev | %CV |
|                   | 79.8 | 7.0    | 8.7 |

**I.S. GLUTAMIC ACID C13, N15 (MSK-A2)**

| STD            | REPLICATE A    | REPLICATE B    | REPLICATE C    | SUPPR. | SUPPR. | SUPPR. | SUPPR. |
|----------------|----------------|----------------|----------------|--------|--------|--------|--------|
| I.S. INTENSITY | I.S. INTENSITY | I.S. INTENSITY | I.S. INTENSITY | A      | B      | C      | Avg    |
| 2270872.5      | 1813055.5      | 1867692.6      | 1785077.5      | 20.2   | 17.8   | 21.4   | 19.8   |
| 596263.3       | 1216254.6      | 1341932.1      | 1256230.8      | -104.0 | -125.1 | -110.7 | -113.2 |
| 2201997.7      | 1342818.1      | 1618271.5      | 1883198.1      | 39.0   | 26.5   | 14.5   | 26.7   |
| 2809685.3      | 1443600.2      | 1574784.2      | 1582395.8      | 48.6   | 44.0   | 43.7   | 45.4   |
| 2421782.2      | 1775977.8      | 1548322.8      | 2282776.9      | 26.7   | 36.1   | 5.7    | 22.8   |

Samples consist of pooled plasma, urine, or CSF, constituting equal volume mixtures from 5-6 separate patients. Samples were analyzed in triplicate and run in 5 separate batches over the course of approximately 1 week, using fresh aliquots of plasma, urine, and CSF stored at -80°C for each run. The IEX reference value reflects single analysis of an aliquot of pooled sample using ion-exchange chromatography (Biochrom Analyzer). Differences in results between the platforms will depend on matrix-specific features and day-to-day performance, including but not limited to quality of analytical separation during IEX analysis and underlying interferences in the pooled samples affecting optical-based detection. Data for aspartic acid and proline are shown for urine due to relevance of the C13,N15 internal standards of these targets to ornithine (Pro closest in retention time, Asp appeared most similar overall to Orn as internal control during initial testing). In the matrix suppression analysis, suppression = (STD I.S. Intensity - Replicate I.S. Intensity) / (STD I.S. Intensity). Run 2 was a single outlier for which suppression of internal standard signal in 0.1 M HCl compared to matrix was not observed. For the remaining runs, suppression was generally greater in the pooled plasma sample compared to urine and CSF. Sample preparation error (\*) resulted in no chromatography peaks in one CSF sample analysis (Run 2, Replicate C).

**Table S13. Matrix-specific precision and signal suppression results (Page 2 of 5).**

**TESTING IN PLASMA (CONTINUED)**

**GLUTAMINE IN PLASMA (IEX REFERENCE VALUE = 517.5 uM)**

| Run | Replicate A | Replicate B | Replicate C | Avg   | STDdev | %CV (Intrarun) |
|-----|-------------|-------------|-------------|-------|--------|----------------|
| 1   | 510.2       | 486.0       | 470.5       | 488.9 | 20.0   | 4.1            |
| 2   | 551.0       | 525.7       | 536.6       | 537.7 | 12.7   | 2.4            |
| 3   | 469.6       | 528.3       | 532.7       | 510.2 | 35.2   | 6.9            |
| 4   | 507.5       | 527.1       | 541.5       | 525.3 | 17.1   | 3.2            |
| 5   | 488.8       | 488.8       | 519.0       | 498.9 | 17.5   | 3.5            |

|                   |       |        |     |
|-------------------|-------|--------|-----|
| n = 15 replicates | Avg   | STDdev | %CV |
|                   | 512.2 | 26.0   | 5.1 |

**GLYCINE IN PLASMA (IEX REFERENCE VALUE = 375.5 uM)**

| Run | Replicate A | Replicate B | Replicate C | Avg   | STDdev | %CV (Intrarun) |
|-----|-------------|-------------|-------------|-------|--------|----------------|
| 1   | 399.1       | 364.5       | 365.7       | 376.4 | 19.6   | 5.2            |
| 2   | 400.9       | 420.6       | 417.7       | 413.1 | 10.6   | 2.6            |
| 3   | 339.5       | 406.3       | 380.3       | 375.3 | 33.7   | 9.0            |
| 4   | 420.2       | 432.4       | 431.6       | 428.1 | 6.8    | 1.6            |
| 5   | 401.3       | 396.3       | 400.2       | 399.2 | 2.6    | 0.7            |

|                   |       |        |     |
|-------------------|-------|--------|-----|
| n = 15 replicates | Avg   | STDdev | %CV |
|                   | 398.4 | 26.3   | 6.6 |

**I.S. GLYCINE C13, N15 (MSK-A2)**

| STD            | REPLICATE A    | REPLICATE B    | REPLICATE C    | SUPPR. | SUPPR. | SUPPR. | SUPPR. |
|----------------|----------------|----------------|----------------|--------|--------|--------|--------|
| I.S. INTENSITY | I.S. INTENSITY | I.S. INTENSITY | I.S. INTENSITY | A      | B      | C      | Avg    |
| 3637497.2      | 2635663.7      | 2898375.6      | 2893975        | 27.5   | 20.3   | 20.4   | 22.8   |
| 820876.3       | 1856534.7      | 2018806.5      | 1903319.8      | -126.2 | -145.9 | -131.9 | -134.7 |
| 4370385.6      | 2336059.5      | 2607505.7      | 3101378.7      | 46.5   | 40.3   | 29.0   | 38.6   |
| 4060489.5      | 2508443.7      | 2724014.5      | 2862251        | 38.2   | 32.9   | 29.5   | 33.5   |
| 4053265.6      | 2951107.4      | 2576231.9      | 3671544.3      | 27.2   | 36.4   | 9.4    | 24.4   |

**HISTADINE (IEX REFERENCE VALUE = 90.6 uM)**

| Run | Replicate A | Replicate B | Replicate C | Avg   | STDdev | %CV (Intrarun) |
|-----|-------------|-------------|-------------|-------|--------|----------------|
| 1   | 95.0        | 100.2       | 102.3       | 99.2  | 3.8    | 3.8            |
| 2   | 92.3        | 100.7       | 99.9        | 100.0 | 0.7    | 0.7            |
| 3   | 97.0        | 98.8        | 97.0        | 97.6  | 1.0    | 1.1            |
| 4   | 94.0        | 98.4        | 96.9        | 96.4  | 2.3    | 2.3            |
| 5   | 96.3        | 91.5        | 93.7        | 93.8  | 2.4    | 2.6            |

|                   |      |        |     |
|-------------------|------|--------|-----|
| n = 15 replicates | Avg  | STDdev | %CV |
|                   | 97.4 | 3.0    | 3.1 |

**I.S. HISTADINE C13, N15 (MSK-A2)**

| STD            | REPLICATE A    | REPLICATE B    | REPLICATE C    | SUPPR. | SUPPR. | SUPPR. | SUPPR. |
|----------------|----------------|----------------|----------------|--------|--------|--------|--------|
| I.S. INTENSITY | I.S. INTENSITY | I.S. INTENSITY | I.S. INTENSITY | A      | B      | C      | Avg    |
| 2515249.9      | 1949196        | 1957211.7      | 1888558.2      | 22.5   | 22.2   | 24.9   | 23.2   |
| 476136.5       | 1170742.9      | 1261126.9      | 1128813.5      | -145.9 | -164.9 | -137.1 | -149.3 |
| 1862665.2      | 1286398.8      | 1596791.6      | 1765297.2      | 30.9   | 14.3   | 5.2    | 16.8   |
| 2217598.1      | 1515241.6      | 1692087.7      | 1796732.6      | 31.7   | 23.7   | 19.0   | 24.8   |
| 2706661.2      | 1788217.9      | 1682682.5      | 2318228.3      | 33.9   | 37.8   | 14.4   | 28.7   |

**ISOLEUCINE (UNDERIVATIZED) IN PLASMA (IEX REFERENCE VALUE = 123.2 uM)**

| Run | Replicate A | Replicate B | Replicate C | Avg   | STDdev | %CV (Intrarun) |
|-----|-------------|-------------|-------------|-------|--------|----------------|
| 1   | 145.7       | 105.1       | 151.1       | 133.9 | 25.2   | 18.8           |
| 2   | 140.3       | 82.9        | 110.1       | 111.1 | 28.7   | 25.9           |
| 3   | 169.8       | 130.4       | 124.5       | 141.6 | 24.6   | 17.4           |
| 4   | 116.2       | 132.4       | 128.9       | 125.8 | 8.6    | 6.8            |
| 5   | 155.6       | 149.2       | 132.6       | 145.1 | 11.0   | 7.6            |

|                   |       |        |      |
|-------------------|-------|--------|------|
| n = 15 replicates | Avg   | STDdev | %CV  |
|                   | 131.5 | 22.0   | 16.7 |

**I.S. ISOLEUCINE C13, N15 (MSK-A2)**

| STD            | REPLICATE A    | REPLICATE B    | REPLICATE C    | SUPPR. | SUPPR. | SUPPR. | SUPPR. |
|----------------|----------------|----------------|----------------|--------|--------|--------|--------|
| I.S. INTENSITY | I.S. INTENSITY | I.S. INTENSITY | I.S. INTENSITY | A      | B      | C      | Avg    |
| 6713.5         | 4716.5         | 6980.9         | 4421.3         | 29.7   | -4.0   | 34.1   | 20.0   |
| 1371.2         | 2492.7         | 4847.3         | 3676.3         | -81.8  | -253.5 | -168.1 | -167.8 |
| 5301.1         | 4598.2         | 3402.7         | 5103           | 13.3   | 35.8   | 3.7    | 17.6   |
| 8387           | 7585.4         | 6035           | 7531.5         | 9.6    | 28.0   | 10.2   | 15.9   |
| 8839.1         | 5720.6         | 5163.7         | 7946.2         | 35.3   | 41.6   | 10.1   | 29.0   |

**ALLO-ISOLEUCINE I IN PLASMA (IEX REFERENCE VALUE = 45.2 uM)**

| Run | Replicate A | Replicate B | Replicate C | Avg  | STDdev | %CV (Intrarun) |
|-----|-------------|-------------|-------------|------|--------|----------------|
| 1   | 49.7        | 33.7        | 49.9        | 44.4 | 9.3    | 20.9           |
| 2   | 48.2        | 29.1        | 36.8        | 38.0 | 9.6    | 25.3           |
| 3   | 59.0        | 46.5        | 43.1        | 49.5 | 8.4    | 16.9           |
| 4   | 40.8        | 48.6        | 44.3        | 44.5 | 3.9    | 8.7            |
| 5   | 57.6        | 55.5        | 48.7        | 53.9 | 4.7    | 8.6            |

|                   |      |        |      |
|-------------------|------|--------|------|
| n = 15 replicates | Avg  | STDdev | %CV  |
|                   | 46.1 | 8.5    | 18.4 |

**LEUCINE IN PLASMA (IEX REFERENCE VALUE = 284.8 uM)**

| Run | Replicate A | Replicate B | Replicate C | Avg   | STDdev | %CV (Intrarun) |
|-----|-------------|-------------|-------------|-------|--------|----------------|
| 1   | 235.7       | 247.0       | 252.7       | 245.1 | 8.7    | 3.5            |
| 2   | 288.0       | 256.7       | 293.7       | 279.5 | 19.9   | 7.1            |
| 3   | 290.3       | 300.2       | 287.7       | 292.7 | 6.6    | 2.2            |
| 4   | 295.0       | 281.7       | 293.2       | 290.0 | 7.2    | 2.5            |
| 5   | 269.6       | 278.3       | 288.7       | 278.8 | 9.6    | 3.4            |

|                   |       |        |     |
|-------------------|-------|--------|-----|
| n = 15 replicates | Avg   | STDdev | %CV |
|                   | 277.2 | 20.1   | 7.2 |

**I.S. LEUCINE C13, N15 (MSK-A2)**

| STD            | REPLICATE A    | REPLICATE B    | REPLICATE C    | SUPPR. | SUPPR. | SUPPR. | SUPPR. |
|----------------|----------------|----------------|----------------|--------|--------|--------|--------|
| I.S. INTENSITY | I.S. INTENSITY | I.S. INTENSITY | I.S. INTENSITY | A      | B      | C      | Avg    |
| 4967912.3      | 3598454        | 3943537.7      | 3556110.6      | 27.6   | 20.6   | 28.4   | 25.5   |
| 1154246.5      | 2464657.7      | 2834228.9      | 2451120.3      | -113.5 | -145.5 | -112.4 | -123.8 |
| 3103563.3      | 1696966.6      | 2102830.5      | 2347898.5      | 45.3   | 32.2   | 24.3   | 34.0   |
| 5050446.2      | 3221690.4      | 3669959.8      | 3850582        | 36.2   | 27.3   | 23.8   | 29.1   |
| 5171612.6      | 4007319.4      | 3488427.8      | 4653901.6      | 22.5   | 32.5   | 10.0   | 21.7   |

**LYSINE IN PLASMA (IEX REFERENCE VALUE = 195.5 uM)**

| Run | Replicate A | Replicate B | Replicate C | Avg   | STDdev | %CV (Intrarun) |
|-----|-------------|-------------|-------------|-------|--------|----------------|
| 1   | 187.3       | 204.7       | 193.2       | 195.0 | 8.9    | 4.5            |
| 2   | 200.4       | 196.9       | 207.3       | 201.5 | 5.3    | 2.6            |
| 3   | 190.4       | 196.9       | 193.2       | 193.5 | 3.3    | 1.7            |
| 4   | 203.6       | 208.0       | 210.2       | 207.3 | 3.4    | 1.6            |
| 5   | 195.2       | 202.6       | 204.6       | 200.8 | 4.9    | 2.5            |

|                   |       |        |     |
|-------------------|-------|--------|-----|
| n = 15 replicates | Avg   | STDdev | %CV |
|                   | 199.6 | 6.9    | 3.5 |

**I.S. LYSINE C13, N15 (MSK-A2)**

| STD            | REPLICATE A    | REPLICATE B    | REPLICATE C    | SUPPR. | SUPPR. | SUPPR. | SUPPR. |
|----------------|----------------|----------------|----------------|--------|--------|--------|--------|
| I.S. INTENSITY | I.S. INTENSITY | I.S. INTENSITY | I.S. INTENSITY | A      | B      | C      | Avg    |
| 1168628.4      | 889036.4       | 897312.1       | 902746         | 23.9   | 23.2   | 22.8   | 23.3   |
| 309194.5       | 674827.2       | 763291.5       | 681467.5       | -118.3 | -146.9 | -120.4 | -128.5 |
| 922193.4       | 515363.7       | 639127.1       | 723274.1       | 44.1   | 30.7   | 21.6   | 32.1   |
| 1255299.9      | 775354.2       | 855328.1       | 914364.8       | 38.2   | 31.9   | 27.2   | 32.4   |
| 1250600.2      | 881581         | 787760         | 1073929.7      | 29.5   | 37.0   | 14.1   | 26.9   |

Samples consist of pooled plasma, urine, or CSF, constituting equal volume mixtures from 5-6 separate patients. Samples were analyzed in triplicate and run in 5 separate batches over the course of approximately 1 week, using fresh aliquots of plasma, urine, and CSF stored at -80°C for each run. The IEX reference value reflects single analysis of an aliquot of pooled sample using ion-exchange chromatography (Biochrom Analyzer). Differences in results between the platforms will depend on matrix-specific features and day-to-day performance, including but not limited to quality of analyte separation during IEX analysis and underlying interferences in the pooled samples affecting optical-based detection. Data for aspartic acid and proline are shown for urine due to relevance of the C13,N15 internal standards of these targets to ornithine (Pro closest in retention time, Asp appeared most similar overall to Orn as internal control during initial testing). In the matrix suppression analysis, suppression = (STD I.S. Intensity - Replicate I.S. Intensity) / (STD I.S. Intensity). Run 2 was a single outlier for which suppression of internal standard signal in 0.1 M HCl compared to matrix was not observed. For the remaining runs, suppression was generally greater in the pooled plasma sample compared to urine and CSF. Sample preparation error (\*) resulted in no chromatography peaks in one CSF sample analysis (Run 2, Replicate C).

**Table S13. Matrix-specific precision and signal suppression results (Page 3 of 5).**

**TESTING IN PLASMA (CONTINUED)**

**METHIONINE IN PLASMA (IEX REFERENCE VALUE = 99.8 uM)**

| Run | Replicate A | Replicate B | Replicate C | Avg   | STDdev | %CV (Intrarun) |
|-----|-------------|-------------|-------------|-------|--------|----------------|
| 1   | 97.8        | 100.7       | 96.5        | 98.3  | 2.2    | 2.2            |
| 2   | 101.2       | 102.9       | 103.1       | 102.4 | 1.0    | 1.0            |
| 3   | 108.3       | 109.2       | 105.5       | 107.7 | 1.9    | 1.8            |
| 4   | 103.8       | 102.6       | 102.4       | 102.9 | 0.8    | 0.8            |
| 5   | 101.6       | 108.7       | 111.2       | 107.2 | 4.9    | 4.6            |

|                   |              |            |            |
|-------------------|--------------|------------|------------|
| n = 15 replicates | Avg          | STDdev     | %CV        |
|                   | <b>103.7</b> | <b>4.2</b> | <b>4.0</b> |

**I.S. METHIONINE C13, N15 (MSK-A2)**

| STD            | REPLICATE A    | REPLICATE B    | REPLICATE C    | SUPPR. | SUPPR. | SUPPR. | SUPPR. |
|----------------|----------------|----------------|----------------|--------|--------|--------|--------|
| I.S. INTENSITY | I.S. INTENSITY | I.S. INTENSITY | I.S. INTENSITY | A      | B      | C      | Avg    |
| 4404821        | 3213930.3      | 3317364.1      | 3357538.5      | 27.0   | 24.7   | 23.8   | 25.2   |
| 1060474.8      | 2324063.5      | 2574141.8      | 2361037        | -119.2 | -142.7 | -122.6 | -128.2 |
| 3311777.4      | 1799843.6      | 2156535.9      | 2566982.8      | 45.7   | 34.9   | 22.5   | 34.3   |
| 4825314.6      | 2998847        | 3323710.5      | 3600653.6      | 37.9   | 31.1   | 25.4   | 31.5   |
| 5113671.5      | 3558684.1      | 3146422.8      | 4309339.4      | 30.4   | 38.5   | 15.7   | 28.2   |

**ORNITHINE IN PLASMA (IEX REFERENCE VALUE = 77.7)**

| Run | Replicate A | Replicate B | Replicate C | Avg  | STDdev | %CV (Intrarun) |
|-----|-------------|-------------|-------------|------|--------|----------------|
| 1   | 85.35       | 78.73       | 74.99       | 79.7 | 5.2    | 6.6            |
| 2   | 80.87       | 82.79       | 81.44       | 81.7 | 1.0    | 1.2            |
| 3   | 80.57       | 79.8        | 80.7        | 80.4 | 0.5    | 0.6            |
| 4   | 77.66       | 77.66       | 77.66       | 77.7 | 0.0    | 0.0            |
| 5   | 77.33       | 79.11       | 75.83       | 77.4 | 1.6    | 2.1            |

|                   |             |            |            |
|-------------------|-------------|------------|------------|
| n = 15 replicates | Avg         | STDdev     | %CV        |
|                   | <b>79.4</b> | <b>2.7</b> | <b>3.4</b> |

**I.S. PHENYLALANINE C13, N15 (MSK-A2)**

| Run | Replicate A | Replicate B | Replicate C | Avg   | STDdev | %CV (Intrarun) |
|-----|-------------|-------------|-------------|-------|--------|----------------|
| 1   | 105.3       | 107.0       | 110.2       | 107.5 | 2.5    | 2.3            |
| 2   | 115.3       | 115.1       | 118.7       | 116.4 | 2.0    | 1.7            |
| 3   | 101.7       | 100.1       | 101.7       | 101.2 | 0.9    | 0.9            |
| 4   | 119.8       | 117.6       | 113.7       | 117.0 | 3.1    | 2.7            |
| 5   | 113.4       | 116.2       | 118.9       | 116.2 | 2.7    | 2.4            |

|                   |              |            |            |
|-------------------|--------------|------------|------------|
| n = 15 replicates | Avg          | STDdev     | %CV        |
|                   | <b>111.6</b> | <b>6.8</b> | <b>6.1</b> |

| STD            | REPLICATE A    | REPLICATE B    | REPLICATE C    | SUPPR. | SUPPR. | SUPPR. | SUPPR. |
|----------------|----------------|----------------|----------------|--------|--------|--------|--------|
| I.S. INTENSITY | I.S. INTENSITY | I.S. INTENSITY | I.S. INTENSITY | A      | B      | C      | Avg    |
| 5868915.6      | 4692072.5      | 5035353.4      | 4823129.6      | 20.1   | 14.2   | 17.8   | 17.4   |
| 1573583        | 3304322.9      | 3716082.7      | 3525951.1      | -110.0 | -136.2 | -124.1 | -123.4 |
| 4288457.8      | 2404498.3      | 3073748.4      | 3421961.8      | 43.9   | 28.3   | 20.2   | 30.8   |
| 6569562.1      | 4075176.1      | 4601888.9      | 4929103.9      | 38.0   | 30.0   | 25.0   | 31.0   |
| 7327580.4      | 4984487.3      | 4460404.6      | 5966393.2      | 32.0   | 39.1   | 18.6   | 29.9   |

**PROLINE IN PLASMA (IEX REFERENCE VALUE = 237.9 uM)**

| Run | Replicate A | Replicate B | Replicate C | Avg   | STDdev | %CV (Intrarun) |
|-----|-------------|-------------|-------------|-------|--------|----------------|
| 1   | 249.2       | 235.4       | 259.9       | 248.2 | 12.3   | 4.9            |
| 2   | 251.5       | 243.0       | 246.7       | 247.1 | 4.3    | 1.7            |
| 3   | 247.5       | 247.8       | 244.2       | 246.5 | 2.0    | 0.8            |
| 4   | 237.2       | 248.0       | 239.6       | 241.6 | 5.7    | 2.4            |
| 5   | 238.5       | 242.2       | 226.0       | 235.6 | 8.5    | 3.6            |

|                   |              |            |            |
|-------------------|--------------|------------|------------|
| n = 15 replicates | Avg          | STDdev     | %CV        |
|                   | <b>243.8</b> | <b>7.9</b> | <b>3.3</b> |

**I.S. PROLINE C13, N15 (MSK-A2)**

| STD            | REPLICATE A    | REPLICATE B    | REPLICATE C    | SUPPR. | SUPPR. | SUPPR. | SUPPR. |
|----------------|----------------|----------------|----------------|--------|--------|--------|--------|
| I.S. INTENSITY | I.S. INTENSITY | I.S. INTENSITY | I.S. INTENSITY | A      | B      | C      | Avg    |
| 2799681.3      | 1878364.1      | 2068509        | 1744202.2      | 32.9   | 26.1   | 37.7   | 32.2   |
| 615401.1       | 1303126.6      | 1533661.2      | 1418999.8      | -111.8 | -149.2 | -130.6 | -130.5 |
| 2185076.3      | 1105969.9      | 1334793.1      | 1581359.7      | 49.4   | 38.9   | 27.6   | 38.6   |
| 2795335.6      | 1628504        | 1822940        | 1928420.2      | 41.7   | 34.8   | 31.0   | 35.8   |
| 2966229.5      | 1819113.7      | 1691658.1      | 2386218        | 38.7   | 43.0   | 19.6   | 33.7   |

**SERINE IN PLASMA (IEX REFERENCE VALUE = 165.2 uM)**

| Run | Replicate A | Replicate B | Replicate C | Avg   | STDdev | %CV (Intrarun) |
|-----|-------------|-------------|-------------|-------|--------|----------------|
| 1   | 161.9       | 162.9       | 158.7       | 161.2 | 2.2    | 1.3            |
| 2   | 175.0       | 180.0       | 177.1       | 177.4 | 2.5    | 1.4            |
| 3   | 179.8       | 182.1       | 171.4       | 177.8 | 5.6    | 3.2            |
| 4   | 194.9       | 177.8       | 186.1       | 186.2 | 8.5    | 4.6            |
| 5   | 191.6       | 193.4       | 200.4       | 195.1 | 4.6    | 2.4            |

|                   |              |             |            |
|-------------------|--------------|-------------|------------|
| n = 15 replicates | Avg          | STDdev      | %CV        |
|                   | <b>179.5</b> | <b>12.5</b> | <b>6.9</b> |

**I.S. SERINE C13, N15 (MSK-A2)**

| STD            | REPLICATE A    | REPLICATE B    | REPLICATE C    | SUPPR. | SUPPR. | SUPPR. | SUPPR. |
|----------------|----------------|----------------|----------------|--------|--------|--------|--------|
| I.S. INTENSITY | I.S. INTENSITY | I.S. INTENSITY | I.S. INTENSITY | A      | B      | C      | Avg    |
| 2912785.3      | 2030774.2      | 2087198.1      | 2178665.2      | 30.3   | 28.3   | 25.2   | 27.9   |
| 658365.2       | 1466382.9      | 1578719.5      | 1471723.5      | -122.7 | -139.8 | -123.5 | -128.7 |
| 2755233.6      | 1579649.7      | 1913079.3      | 2189425.6      | 42.7   | 30.6   | 20.5   | 31.3   |
| 3423052        | 1832569.6      | 2137418.9      | 2261255.2      | 46.5   | 37.6   | 33.9   | 39.3   |
| 3373275.8      | 1996637.6      | 1801911.8      | 2518114.1      | 40.8   | 46.6   | 25.4   | 37.6   |

**THREONINE IN PLASMA (IEX REFERENCE VALUE = 164.7 uM)**

| Run | Replicate A | Replicate B | Replicate C | Avg   | STDdev | %CV (Intrarun) |
|-----|-------------|-------------|-------------|-------|--------|----------------|
| 1   | 154.6       | 150.3       | 146.4       | 150.4 | 4.1    | 2.7            |
| 2   | 156.7       | 159.5       | 167.4       | 161.2 | 5.5    | 3.4            |
| 3   | 169.9       | 167.2       | 171.5       | 169.5 | 2.2    | 1.3            |
| 4   | 157.1       | 164.3       | 170.3       | 163.9 | 6.6    | 4.0            |
| 5   | 169.2       | 162.7       | 174.7       | 168.8 | 6.0    | 3.6            |

|                   |              |            |            |
|-------------------|--------------|------------|------------|
| n = 15 replicates | Avg          | STDdev     | %CV        |
|                   | <b>162.8</b> | <b>8.4</b> | <b>5.1</b> |

**I.S. THREONINE C13, N15 (MSK-A2)**

| STD            | REPLICATE A    | REPLICATE B    | REPLICATE C    | SUPPR. | SUPPR. | SUPPR. | SUPPR. |
|----------------|----------------|----------------|----------------|--------|--------|--------|--------|
| I.S. INTENSITY | I.S. INTENSITY | I.S. INTENSITY | I.S. INTENSITY | A      | B      | C      | Avg    |
| 3165128.1      | 2642323.2      | 2747697.6      | 2690742        | 16.5   | 13.2   | 15.0   | 14.9   |
| 760927.6       | 1748821.4      | 1902320.3      | 1735271.3      | -129.8 | -150.0 | -128.0 | -136.0 |
| 2755233.6      | 1579649.7      | 1913079.3      | 2189425.6      | 42.7   | 30.6   | 20.5   | 31.3   |
| 3684818.5      | 2246504.9      | 2281936.7      | 2456307.6      | 39.0   | 38.1   | 33.3   | 36.8   |
| 3362484.3      | 2375063.6      | 2255592.5      | 3001100.1      | 29.4   | 32.9   | 10.7   | 24.3   |

**TRYPTOPHAN IN PLASMA (IEX REFERENCE VALUE = 74.4)**

| Run | Replicate A | Replicate B | Replicate C | Avg   | STDdev | %CV (Intrarun) |
|-----|-------------|-------------|-------------|-------|--------|----------------|
| 1   | 98.7        | 91.33       | 90.28       | 93.4  | 4.6    | 4.9            |
| 2   | 87.78       | 87.36       | 89.81       | 88.3  | 1.3    | 1.5            |
| 3   | 98.25       | 110.6       | 105.73      | 104.9 | 6.2    | 5.9            |
| 4   | 101.14      | 101.45      | 104.35      | 102.3 | 1.8    | 1.7            |
| 5   | 90.9        | 94.76       | 89.04       | 91.6  | 2.9    | 3.2            |

|                   |             |            |            |
|-------------------|-------------|------------|------------|
| n = 15 replicates | Avg         | STDdev     | %CV        |
|                   | <b>96.1</b> | <b>7.4</b> | <b>7.7</b> |

Samples consist of pooled plasma, urine, or CSF, constituting equal volume mixtures from 5-6 separate patients. Samples were analyzed in triplicate and run in 5 separate batches over the course of approximately 1 week, using fresh aliquots of plasma, urine, and CSF stored at -80°C for each run. The IEX reference value reflects single analysis of an aliquot of pooled sample using ion-exchange chromatography (Biochrom Analyzer). Differences in results between the platforms will depend on matrix-specific features and day-to-day performance, including but not limited to quality of analyte separation during IEX analysis and underlying interferences in the pooled samples affecting optical-based detection. Data for aspartic acid and proline are shown for urine due to relevance of the C13,N15 internal standards of these targets to ornithine (Pro closest in retention time, Asp appeared most similar overall to Orn as internal control during initial testing). In the matrix suppression analysis, suppression = (STD I.S. Intensity - Replicate I.S. Intensity) / (STD I.S. Intensity). Run 2 was a single outlier for which suppression of internal standard signal in 0.1 M HCl compared to matrix was not observed. For the remaining runs, suppression was generally greater in the pooled plasma sample compared to urine and CSF. Sample preparation error (\*) resulted in no chromatography peaks in one CSF sample analysis (Run 2, Replicate C).

**Table S13. Matrix-specific precision and signal suppression results (Page 4 of 5).**  
**TESTING IN PLASMA (CONTINUED)**

**TYROSINE IN PLASMA (IEX REFERENCE VALUE = 105.0 uM)**

| Run                      | Replicate A | Replicate B | Replicate C | Avg          | STDdev        | %CV (Intrarun) |
|--------------------------|-------------|-------------|-------------|--------------|---------------|----------------|
| 1                        | 110.4       | 112.7       | 119.8       | 114.3        | 4.9           | 4.3            |
| 2                        | 117.2       | 115.3       | 123.0       | 118.5        | 4.0           | 3.4            |
| 3                        | 110.9       | 114.1       | 111.4       | 112.1        | 1.7           | 1.5            |
| 4                        | 112.8       | 120.1       | 111.2       | 114.7        | 4.8           | 4.2            |
| 5                        | 110.7       | 114.1       | 118.2       | 114.3        | 3.8           | 3.3            |
| <b>n = 15 replicates</b> |             |             |             | <b>Avg</b>   | <b>STDdev</b> | <b>%CV</b>     |
|                          |             |             |             | <b>114.8</b> | <b>4.0</b>    | <b>3.5</b>     |

**I.S. TYROSINE C13, N15 (MSK-A2)**

| STD            | REPLICATE A    | REPLICATE B    | REPLICATE C    | SUPPR. | SUPPR. | SUPPR. | SUPPR. |
|----------------|----------------|----------------|----------------|--------|--------|--------|--------|
| I.S. INTENSITY | I.S. INTENSITY | I.S. INTENSITY | I.S. INTENSITY | A      | B      | C      | Avg    |
| 3185544.4      | 2490174.2      | 2717887.6      | 2543020.7      | 21.8   | 14.7   | 20.2   | 18.9   |
| 870659.5       | 1890728.9      | 2063104.1      | 1887238.2      | -117.2 | -137.0 | -116.8 | -123.6 |
| 2529882.7      | 1397339.3      | 1738543.9      | 2012331.3      | 44.8   | 31.3   | 20.5   | 32.2   |
| 3669464.8      | 2399801.7      | 2660933.8      | 2955443.2      | 34.6   | 27.5   | 19.5   | 27.2   |
| 4184592.1      | 2938263.7      | 2436975.1      | 3418322.5      | 29.8   | 41.8   | 18.3   | 30.0   |

**VALINE IN PLASMA (IEX REFERENCE VALUE = 313.4 uM)**

| Run                      | Replicate A | Replicate B | Replicate C | Avg          | STDdev        | %CV (Intrarun) |
|--------------------------|-------------|-------------|-------------|--------------|---------------|----------------|
| 1                        | 298.3       | 318.2       | 320.9       | 312.5        | 12.4          | 4.0            |
| 2                        | 324.2       | 320.4       | 316.1       | 320.2        | 4.1           | 1.3            |
| 3                        | 315.0       | 334.1       | 333.1       | 327.4        | 10.7          | 3.3            |
| 4                        | 318.0       | 308.2       | 323.5       | 316.6        | 7.8           | 2.5            |
| 5                        | 330.0       | 322.6       | 319.6       | 324.1        | 5.3           | 1.6            |
| <b>n = 15 replicates</b> |             |             |             | <b>Avg</b>   | <b>STDdev</b> | <b>%CV</b>     |
|                          |             |             |             | <b>320.1</b> | <b>9.1</b>    | <b>2.8</b>     |

**I.S. VALINE C13, N15 (MSK-A2)**

| STD            | REPLICATE A    | REPLICATE B    | REPLICATE C    | SUPPR. | SUPPR. | SUPPR. | SUPPR. |
|----------------|----------------|----------------|----------------|--------|--------|--------|--------|
| I.S. INTENSITY | I.S. INTENSITY | I.S. INTENSITY | I.S. INTENSITY | A      | B      | C      | Avg    |
| 3205994.9      | 2456237.8      | 2493833.2      | 2358422.1      | 23.4   | 22.2   | 26.4   | 24.0   |
| 743450         | 1637249.9      | 1781507.7      | 1718047.1      | -120.2 | -139.6 | -131.1 | -130.3 |
| 2130742.7      | 1147819.6      | 1456864.3      | 1690435.6      | 46.1   | 31.6   | 20.7   | 32.8   |
| 3794175.6      | 2359681.4      | 2753936.6      | 2817267.2      | 37.8   | 27.4   | 25.7   | 30.3   |
| 3720656.4      | 2679521.8      | 2334126.8      | 3343633.7      | 28.0   | 37.3   | 10.1   | 25.1   |

**TESTING IN URINE (TARGET ANALYTES = ARGININE, LYSINE AND ORNITHINE)**

**ARGININE IN URINE (IEX REFERENCE VALUE = 8.2 uM)**

| Run                      | Replicate A | Replicate B | Replicate C | Avg         | STDdev        | %CV (Intrarun) |
|--------------------------|-------------|-------------|-------------|-------------|---------------|----------------|
| 1                        | 31.89       | 30.02       | 30.19       | 30.7        | 1.0           | 3.4            |
| 2                        | 29.7        | 31.45       | 29.06       | 30.1        | 1.2           | 4.1            |
| 3                        | 32.07       | 33.43       | 35.21       | 33.6        | 1.6           | 4.7            |
| 4                        | 36.62       | 35.4        | 34.34       | 35.5        | 1.1           | 3.2            |
| 5                        | 33.92       | 32.67       | 33.38       | 33.3        | 0.6           | 1.9            |
| <b>n = 15 replicates</b> |             |             |             | <b>Avg</b>  | <b>STDdev</b> | <b>%CV</b>     |
|                          |             |             |             | <b>32.6</b> | <b>2.3</b>    | <b>7.0</b>     |

**I.S. ARGININE C13, N15 (MSK-A2)**

| STD            | REPLICATE A    | REPLICATE B    | REPLICATE C    | SUPPR. | SUPPR. | SUPPR. | SUPPR. |
|----------------|----------------|----------------|----------------|--------|--------|--------|--------|
| I.S. INTENSITY | I.S. INTENSITY | I.S. INTENSITY | I.S. INTENSITY | A      | B      | C      | Avg    |
| 2548978.6      | 2466282.6      | 2606391.9      | 2605059.6      | 3.2    | -2.3   | -2.2   | -0.4   |
| 664968.5       | 1876040.3      | 1872587.8      | 1804798.7      | -182.1 | -181.6 | -171.4 | -178.4 |
| 1834163.4      | 1781742        | 1692134.8      | 1874465.1      | 2.9    | 7.7    | -2.2   | 2.8    |
| 2476249.2      | 1995746.4      | 2175603.4      | 2021436        | 19.4   | 12.1   | 18.4   | 16.6   |
| 2344328.8      | 3111065.5      | 2766805.5      | 2747534.5      | -32.7  | -18.0  | -17.2  | -22.6  |

**ASPARTIC ACID IN URINE (IEX REFERENCE VALUE = 8.87 uM)**

| Run                      | Replicate A | Replicate B | Replicate C | Avg        | STDdev        | %CV (Intrarun) |
|--------------------------|-------------|-------------|-------------|------------|---------------|----------------|
| 1                        | 8.35        | 8.27        | 7.79        | 8.1        | 0.3           | 3.7            |
| 2                        | 7.04        | 8.19        | 8.28        | 7.8        | 0.7           | 8.8            |
| 3                        | 7.9         | 7.75        | 8.06        | 7.9        | 0.2           | 2.0            |
| 4                        | 9.21        | 9.72        | 8.53        | 9.2        | 0.6           | 6.5            |
| 5                        | 8.62        | 7.86        | 7.93        | 8.1        | 0.4           | 5.2            |
| <b>n = 15 replicates</b> |             |             |             | <b>Avg</b> | <b>STDdev</b> | <b>%CV</b>     |
|                          |             |             |             | <b>8.2</b> | <b>0.6</b>    | <b>7.7</b>     |

**I.S. ASPARTIC ACID C13, N15 (MSK-A2)**

| STD            | REPLICATE A    | REPLICATE B    | REPLICATE C    | SUPPR. | SUPPR. | SUPPR. | SUPPR. |
|----------------|----------------|----------------|----------------|--------|--------|--------|--------|
| I.S. INTENSITY | I.S. INTENSITY | I.S. INTENSITY | I.S. INTENSITY | A      | B      | C      | Avg    |
| 2336347        | 26223649.4     | 2397922.9      | 2535981        | -12.3  | -2.6   | -8.5   | -7.8   |
| 553561         | 1612672.8      | 1566381.6      | 1462755.5      | -191.3 | -183.0 | -164.2 | -179.5 |
| 2581749.8      | 2272603.7      | 2260103.8      | 2433604.5      | 12.0   | 12.5   | 5.7    | 10.1   |
| 2631483        | 2143552.4      | 2187881.5      | 2117917.4      | 18.5   | 16.9   | 19.5   | 18.3   |
| 2618287.5      | 2586703.6      | 2293713.4      | 2446328        | 1.2    | 12.4   | 6.6    | 6.7    |

**LYSINE IN URINE (IEX REFERENCE VALUE = 168.55 uM)**

| Run                      | Replicate A | Replicate B | Replicate C | Avg          | STDdev        | %CV (Intrarun) |
|--------------------------|-------------|-------------|-------------|--------------|---------------|----------------|
| 1                        | 133.46      | 130.2       | 132.63      | 132.1        | 1.7           | 1.3            |
| 2                        | 128.04      | 125.12      | 122.68      | 125.3        | 2.7           | 2.1            |
| 3                        | 132.05      | 127.37      | 125.67      | 128.4        | 3.3           | 2.6            |
| 4                        | 141.74      | 139.55      | 145         | 142.1        | 2.7           | 1.9            |
| 5                        | 130.27      | 135.02      | 134.46      | 133.3        | 2.6           | 1.9            |
| <b>n = 15 replicates</b> |             |             |             | <b>Avg</b>   | <b>STDdev</b> | <b>%CV</b>     |
|                          |             |             |             | <b>132.2</b> | <b>6.3</b>    | <b>4.8</b>     |

**I.S. LYSINE C13, N15 (MSK-A2)**

| STD            | REPLICATE A    | REPLICATE B    | REPLICATE C    | SUPPR. | SUPPR. | SUPPR. | SUPPR. |
|----------------|----------------|----------------|----------------|--------|--------|--------|--------|
| I.S. INTENSITY | I.S. INTENSITY | I.S. INTENSITY | I.S. INTENSITY | A      | B      | C      | Avg    |
| 1168628.4      | 1222650.6      | 1136282.2      | 1206968.1      | 4.6    | 2.8    | -3.3   | -1.7   |
| 309194.5       | 886775.7       | 858622.5       | 805701.1       | -186.8 | -177.7 | -161.2 | -175.2 |
| 922193.4       | 787390.4       | 768191.7       | 857424.1       | 14.6   | 16.7   | 7.0    | 12.8   |
| 1255299.9      | 1057009.4      | 1080410.4      | 1025004.5      | 15.8   | 13.9   | 18.3   | 16.0   |
| 1250600.2      | 1248210.3      | 1057268.5      | 1079881.6      | 0.2    | 15.5   | 13.7   | 9.8    |

**ORNITHINE IN URINE (IEX REFERENCE VALUE = 9.96)**

| Run                      | Replicate A | Replicate B | Replicate C | Avg         | STDdev        | %CV (Intrarun) |
|--------------------------|-------------|-------------|-------------|-------------|---------------|----------------|
| 1                        | 11.8        | 12.23       | 11.09       | 11.7        | 0.6           | 4.9            |
| 2                        | 9.71        | 10.46       | 10.2        | 10.1        | 0.4           | 3.8            |
| 3                        | 10          | 10.31       | 10.94       | 10.4        | 0.5           | 4.6            |
| 4                        | 13.01       | 14.92       | 12.52       | 13.5        | 1.3           | 9.4            |
| 5                        | 12.68       | 11.33       | 11.46       | 11.8        | 0.7           | 6.3            |
| <b>n = 15 replicates</b> |             |             |             | <b>Avg</b>  | <b>STDdev</b> | <b>%CV</b>     |
|                          |             |             |             | <b>11.5</b> | <b>1.4</b>    | <b>12.1</b>    |

**PROLINE IN URINE (IEX REFERENCE VALUE = 0 uM)**

| Run                      | Replicate A | Replicate B | Replicate C | Avg        | STDdev        | %CV (Intrarun) |
|--------------------------|-------------|-------------|-------------|------------|---------------|----------------|
| 1                        | 7.61        | 7.41        | 8.02        | 7.7        | 0.3           | 4.0            |
| 2                        | 7.13        | 7.33        | 7.62        | 7.4        | 0.2           | 3.3            |
| 3                        | 7.28        | 7.65        | 8.01        | 7.6        | 0.4           | 4.8            |
| 4                        | 7.94        | 8.13        | 7.39        | 7.8        | 0.4           | 4.9            |
| 5                        | 7.59        | 6.94        | 6.71        | 7.1        | 0.5           | 6.4            |
| <b>n = 15 replicates</b> |             |             |             | <b>Avg</b> | <b>STDdev</b> | <b>%CV</b>     |
|                          |             |             |             | <b>7.5</b> | <b>0.4</b>    | <b>5.4</b>     |

**I.S. PROLINE C13, N15 (MSK-A2)**

| STD            | REPLICATE A    | REPLICATE B    | REPLICATE C    | SUPPR. | SUPPR. | SUPPR. | SUPPR. |
|----------------|----------------|----------------|----------------|--------|--------|--------|--------|
| I.S. INTENSITY | I.S. INTENSITY | I.S. INTENSITY | I.S. INTENSITY | A      | B      | C      | Avg    |
| 2799681.3      | 2425942.7      | 2472741.4      | 2538339.7      | 13.3   | 11.7   | 9.3    | 11.5   |
| 615401.1       | 1806015.3      | 1720068.2      | 1568481.3      | -193.5 | -179.5 | -154.9 | -175.9 |
| 2185076.3      | 1742163.8      | 1682722.1      | 1960518.9      | 20.3   | 23.0   | 10.3   | 17.8   |
| 2795335.6      | 2269531        | 2259389        | 2204010.7      | 18.8   | 19.2   | 21.2   | 19.7   |
| 2966229.5      | 2711365.1      | 2604399.7      | 2708621.4      | 8.6    | 12.2   | 8.7    | 9.8    |

Samples consist of pooled plasma, urine, or CSF, constituting equal volume mixtures from 5-6 separate patients. Samples were analyzed in triplicate and run in 5 separate batches over the course of approximately 1 week, using fresh aliquots of plasma, urine, and CSF stored at -80°C for each run. The IEX reference value reflects single analysis of an aliquot of pooled sample using ion-exchange chromatography (Biochrom Analyzer). Differences in results between the platforms will depend on matrix-specific features and day-to-day performance, including but not limited to quality of analyte separation during IEX analysis and underlying interferences in the pooled samples affecting optical-based detection. Data for aspartic acid and proline are shown for urine due to relevance of the C13,N15 internal standards of these targets to ornithine (Pro closest in retention time, Asp appeared most similar overall to Orn as internal control during initial testing). In the matrix suppression analysis, suppression = (STD I.S. Intensity - Replicate I.S. Intensity) / (STD I.S. Intensity). Run 2 was a single outlier for which suppression of internal standard signal in 0.1 M HCl compared to matrix was not observed. For the remaining runs, suppression was generally greater in the pooled plasma sample compared to urine and CSF. Sample preparation error (\*) resulted in no chromatography peaks in one CSF sample analysis (Run 2, Replicate C).

**Table S13. Matrix-specific precision and signal suppression results (Page 5 of 5).**

**TESTING IN CSF (TARGET ANALYTES = GLYCINE AND SERINE)**

**GLYCINE IN CSF (IEX REFERENCE VALUE = 62.2 uM)**

| Run | Replicate A | Replicate B | Replicate C | Avg  | STDdev | %CV (Intrarun) |
|-----|-------------|-------------|-------------|------|--------|----------------|
| 1   | 66.0        | 65.0        | 63.6        | 64.8 | 1.2    | 1.9            |
| 2   | 70.7        | 67.5        | *           | 69.1 | 2.3    | 3.3            |
| 3   | 58.4        | 60.6        | 60.8        | 59.9 | 1.3    | 2.3            |
| 4   | 70.5        | 67.4        | 66.4        | 68.1 | 2.1    | 3.1            |
| 5   | 66.9        | 59.7        | 57.7        | 61.4 | 4.8    | 7.8            |

|                   |      |        |     |
|-------------------|------|--------|-----|
| n = 14 replicates | Avg  | STDdev | %CV |
|                   | 64.4 | 4.3    | 6.7 |

**I.S. GLYCINE C13, N15 (MSK-A2)**

| STD            | REPLICATE A    | REPLICATE B    | REPLICATE C    | SUPPR. | SUPPR. | SUPPR. | SUPPR. |
|----------------|----------------|----------------|----------------|--------|--------|--------|--------|
| I.S. INTENSITY | I.S. INTENSITY | I.S. INTENSITY | I.S. INTENSITY | A      | B      | C      | Avg    |
| 3637497.2      | 3652634.4      | 3426375        | 3555922.9      | -0.4   | 5.8    | 2.2    | 2.5    |
| 820876.3       | 1993137.2      | 2409282.6      | *              | -142.8 | -193.5 | *      | -168.2 |
| 4370385.6      | 3949037.9      | 3964922        | 4109487.1      | 9.6    | 9.3    | 6.0    | 8.3    |
| 4060489.5      | 3114442.7      | 3588391.2      | 3546863.4      | 23.3   | 11.6   | 12.6   | 15.9   |
| 4053265.6      | 4423952.1      | 4934997.4      | 5566313.4      | -9.1   | -21.8  | -37.3  | -22.7  |

**SERINE IN CSF (IEX REFERENCE VALUE = 34.3 uM)**

| Run | Replicate A | Replicate B | Replicate C | Avg  | STDdev | %CV (Intrarun) |
|-----|-------------|-------------|-------------|------|--------|----------------|
| 1   | 32.6        | 32.1        | 36.1        | 33.6 | 2.2    | 6.6            |
| 2   | 37.3        | 38.0        | *           | 37.6 | 0.5    | 1.3            |
| 3   | 35.6        | 37.5        | 38.8        | 37.3 | 1.6    | 4.3            |
| 4   | 35.3        | 37.8        | 40.8        | 38.0 | 2.7    | 7.2            |
| 5   | 43.5        | 42.7        | 39.6        | 42.0 | 2.1    | 4.9            |

|                   |      |        |     |
|-------------------|------|--------|-----|
| n = 14 replicates | Avg  | STDdev | %CV |
|                   | 37.7 | 3.3    | 8.8 |

**I.S. SERINE C13, N15 (MSK-A2)**

| STD            | REPLICATE A    | REPLICATE B    | REPLICATE C    | SUPPR. | SUPPR. | SUPPR. | SUPPR. |
|----------------|----------------|----------------|----------------|--------|--------|--------|--------|
| I.S. INTENSITY | I.S. INTENSITY | I.S. INTENSITY | I.S. INTENSITY | A      | B      | C      | Avg    |
| 2912785.3      | 2968357.2      | 2919708.2      | 2749405.9      | -1.9   | -0.2   | 5.6    | 1.2    |
| 658365.2       | 1550758.9      | 1731617.8      | *              | -135.5 | -163.0 | *      | -149.3 |
| 2755233.6      | 2583947.7      | 2666857.9      | 2747504.8      | 6.2    | 3.2    | 0.3    | 3.2    |
| 3423052        | 2464538.4      | 2703154.4      | 2678801.5      | 28.0   | 21.0   | 21.7   | 23.6   |
| 3373275.8      | 2721142.5      | 2736578.3      | 2919810        | 19.3   | 18.9   | 13.4   | 17.2   |

Samples consist of pooled plasma, urine, or CSF, constituting equal volume mixtures from 5-6 separate patients. Samples were analyzed in triplicate and run in 5 separate batches over the course of approximately 1 week, using fresh aliquots of plasma, urine, and CSF stored at -80°C for each run. The IEX reference value reflects single analysis of an aliquot of pooled sample using ion-exchange chromatography (Biochrom Analyzer). Differences in results between the platforms will depend on matrix-specific features and day-to-day performance, including but not limited to quality of analyte separation during IEX analysis and underlying interferences in the pooled samples affecting optical-based detection. Data for aspartic acid and proline are shown for urine due to relevance of the C13,N15 internal standards of these targets to ornithine (Pro closest in retention time, Asp appeared most similar overall to Orn as internal control during initial testing). In the matrix suppression analysis, suppression = (STD I.S. Intensity - Replicate I.S. Intensity) / (STD I.S. Intensity). Run 2 was a single outlier for which suppression of internal standard signal in 0.1 M HCl compared to matrix was not observed. For the remaining runs, suppression was generally greater in the pooled plasma sample compared to urine and CSF. Sample preparation error (\*) resulted in no chromatography peaks in one CSF sample analysis (Run 2, Replicate C).



**Table S14. Lipemia mixing studies (plasma).**

| AA   | Unmixed LC-MS/MS (µM) |     |     |     |     |     | Mixed A+F   |           |           | Mixed B+F   |           |           | Mixed C+F   |           |           | Mixed D+F   |           |           | Mixed E+F   |           |           |
|------|-----------------------|-----|-----|-----|-----|-----|-------------|-----------|-----------|-------------|-----------|-----------|-------------|-----------|-----------|-------------|-----------|-----------|-------------|-----------|-----------|
|      | A                     | B   | C   | D   | E   | F   | Result (µM) | Exp. (µM) | Diff. (%) | Result (µM) | Exp. (µM) | Diff. (%) | Result (µM) | Exp. (µM) | Diff. (%) | Result (µM) | Exp. (µM) | Diff. (%) | Result (µM) | Exp. (µM) | Diff. (%) |
| Tau  | 53                    | 16  | 104 | 21  | 137 | 126 | 87          | 90        | -3.4      | 78          | 71        | 9.0       | 100         | 115       | -15.0     | 70          | 74        | -5.7      | 156         | 132       | 15.4      |
| PEA  | <5                    | <5  | <5  | <5  | <5  | <5  | <5          | <5        | N/A       | <5          | <5        | N/A       | <5          | <5        | N/A       | <5          | <5        | N/A       | <5          | <5        | N/A       |
| Asp  | 6                     | 7   | 14  | <5  | 14  | 16  | 12          | 11        | 8.3       | 12          | 12        | 0.0       | 15          | 15        | 0.0       | 10          | 11        | -10.0     | 15          | 15        | 0.0       |
| Thr  | 95                    | 56  | 161 | 286 | 209 | 172 | 134         | 134       | 0.0       | 113         | 114       | -0.9      | 169         | 167       | 1.2       | 251         | 229       | 8.8       | 195         | 191       | 2.1       |
| Ser  | 137                   | 83  | 95  | 133 | 92  | 168 | 160         | 153       | 4.4       | 134         | 126       | 6.0       | 128         | 132       | -3.1      | 157         | 151       | 3.8       | 133         | 130       | 2.3       |
| Asn  | 81                    | 51  | 57  | <5  | 59  | 64  | 79          | 73        | 7.6       | 54          | 58        | -7.4      | 62          | 61        | 1.6       | 33          | 35        | -6.1      | 66          | 62        | 6.1       |
| Glu  | 90                    | 145 | 252 | 441 | 240 | 46  | 66          | 68        | -3.0      | 85          | 96        | -12.9     | 144         | 149       | -3.5      | 237         | 244       | -3.0      | 141         | 143       | -1.4      |
| Gln  | 609                   | 369 | 402 | <5  | 391 | 504 | 534         | 554       | -3.7      | 391         | 437       | -11.8     | 423         | 453       | -7.1      | 230         | 255       | -10.9     | 404         | 448       | -10.9     |
| Gly  | 159                   | 273 | 168 | 266 | 158 | 498 | 318         | 329       | -3.5      | 338         | 386       | -14.2     | 328         | 333       | -1.5      | 348         | 382       | -9.8      | 322         | 328       | -1.9      |
| Ala  | 300                   | 377 | 274 | 640 | 331 | 283 | 283         | 292       | -3.2      | 315         | 330       | -4.8      | 282         | 279       | 1.1       | 451         | 462       | -2.4      | 311         | 307       | 1.3       |
| Cit  | 15                    | 10  | 12  | 11  | 15  | 27  | 20          | 21        | -5.0      | 16          | 19        | -18.8     | 18          | 20        | -11.1     | 19          | 19        | 0.0       | 20          | 21        | -5.0      |
| Val  | 167                   | 166 | 212 | 333 | 276 | 140 | 154         | 154       | 0.0       | 152         | 153       | -0.7      | 178         | 176       | 1.1       | 239         | 237       | 0.8       | 209         | 208       | 0.5       |
| Cys  | 11                    | 11  | 67  | 16  | 68  | 10  | 10          | 11        | -10.0     | 9           | 11        | -22.2     | 37          | 39        | -5.4      | 11          | 13        | -18.2     | 45          | 39        | 13.3      |
| Met  | 22                    | 9   | 20  | 21  | 28  | 26  | 23          | 24        | -4.3      | 17          | 18        | -5.9      | 24          | 23        | 4.2       | 23          | 24        | -4.3      | 28          | 27        | 3.6       |
| alle | <5                    | <5  | <5  | <5  | <5  | <5  | <5          | <5        | N/A       | <5          | <5        | N/A       | <5          | <5        | N/A       | <5          | <5        | N/A       | <5          | <5        | N/A       |
| Ile  | 65                    | 23  | 98  | 76  | 132 | 49  | 57          | 57        | 0.0       | 34          | 36        | -5.9      | 77          | 74        | 3.9       | 66          | 63        | 4.5       | 96          | 91        | 5.2       |
| Leu  | 103                   | 62  | 134 | 178 | 183 | 95  | 100         | 99        | 1.0       | 73          | 79        | -8.2      | 115         | 115       | 0.0       | 141         | 137       | 2.8       | 148         | 139       | 6.1       |
| ASA  | <5                    | <5  | <5  | <5  | <5  | <5  | <5          | <5        | N/A       | <5          | <5        | N/A       | <5          | <5        | N/A       | <5          | <5        | N/A       | <5          | <5        | N/A       |
| Tyr  | 63                    | 43  | 53  | 47  | 74  | 34  | 43          | 49        | -14.0     | 36          | 39        | -8.3      | 44          | 44        | 0.0       | 39          | 41        | -5.1      | 55          | 54        | 1.8       |
| Phe  | 36                    | 31  | 59  | 186 | 67  | 482 | 273         | 259       | 5.1       | 245         | 257       | -4.9      | 308         | 271       | 12.0      | 336         | 334       | 0.6       | 295         | 275       | 6.8       |
| HCY  | <5                    | <5  | <5  | <5  | <5  | <5  | <5          | <5        | N/A       | <5          | <5        | N/A       | <5          | <5        | N/A       | <5          | <5        | N/A       | <5          | <5        | N/A       |
| Orn  | 89                    | 52  | 94  | 71  | 100 | 73  | 77          | 81        | -5.2      | 61          | 63        | -3.3      | 78          | 84        | -7.7      | 76          | 72        | 5.3       | 85          | 87        | -2.4      |
| Lys  | 137                   | 91  | 170 | 126 | 204 | 101 | 126         | 119       | 5.6       | 91          | 96        | -5.5      | 144         | 134       | 6.9       | 109         | 114       | -4.6      | 165         | 153       | 7.3       |
| His  | 81                    | 65  | 65  | 98  | 72  | 75  | 76          | 78        | -2.6      | 66          | 70        | -6.1      | 69          | 70        | -1.4      | 86          | 87        | -1.2      | 73          | 74        | -1.4      |
| Trp  | 59                    | 22  | 49  | 19  | 50  | 33  | 46          | 46        | 0.0       | 27          | 28        | -3.7      | 41          | 41        | 0.0       | 26          | 26        | 0.0       | 42          | 42        | 0.0       |
| Arg  | 111                   | 5   | 65  | 36  | 60  | 74  | 89          | 93        | -4.5      | 37          | 40        | -8.1      | 64          | 70        | -9.4      | 50          | 55        | -10.0     | 63          | 67        | -6.3      |
| Pro  | 187                   | 178 | 274 | 241 | 394 | 119 | 152         | 153       | -0.7      | 143         | 149       | -4.2      | 192         | 197       | -2.6      | 193         | 180       | 6.7       | 274         | 257       | 6.2       |
| HCT  | <5                    | <5  | <5  | <5  | <5  | <5  | <5          | <5        | N/A       | <5          | <5        | N/A       | <5          | <5        | N/A       | <5          | <5        | N/A       | <5          | <5        | N/A       |

Sample A Trig = 445 mg/dL, Sample B Trig = 1151 mg/dL, Sample C Trig = 1081 mg/dL. Sample D Trig = 1588 mg/dL, Sample E Trig = 1756 mg/dL, Sample F Trig = 52 mg/dL
